# Supplementary material for: Differential LTR-retrotransposon dynamics across polyploidization, speciation, domestication and improvement of cotton (Gossypium)
Source: Research Square preprint supplement (doi:10.21203/rs.3.rs-6172192/v1), 2025-03-21
Supplement: Supplementary file 1 [file 1b39842b2ba4320cb5247133.xlsx]

## Sheet: Stable1
Stable1. Number and percentage of TIPs classified into LTR-RT lineages and type (intact or solo element) within the G. hirsutum pangenome.
LTR-RT lineage	Intact LTR-RT TIPs	solo-LTR TIPs	% polymorphic LTR-RTs	% polymorphic solo-LTR
Ale	68	7	7.62332	2.97872
Alesia	0	0	0	0
Angela	0	2	0	0.581395
Athila	1	13	0.0918274	0.242356
Bianca	0	0	0	0
CRM	28	308	1.04167	19.3467
Galadriel	92	18	21.5962	4.8
Ikeros	0	1	0	0.251889
Ivana	639	43	41.6558	12.5731
Ogre	19	18	1.90763	0.555899
Reina	5	0	3.5461	0
SIRE	0	0	0	0
TAR	17	7	10.6918	0.840336
Tekay	2028	1897	23.4315	12.2182
Tork	1539	92	44.9343	4.94092
total	4436	2406	21.9137	7.83127

## Sheet: Stable2
Stable2. Number and percentage of TIPs classified into LTR-RT lineages and type (intact or solo element) within the G. barbadense pangenome.
LTR-RT lineage	Intact LTR-RT TIPs	solo-LTR TIPs	% polymorphic LTR-RTs	% polymorphic solo-LTR
Ale	51	7	5.28497	2.99145
Alesia	0	0	0	0
Angela	0	3	0	1.18577
Athila	2	14	0.180668	0.239234
Bianca	0	0	0	0
CRM	4	110	0.309837	5.93952
Galadriel	55	9	13.0952	2.72727
Ikeros	0	1	0	0.290698
Ivana	552	34	32.5856	9.01857
Ogre	14	8	1.74782	0.349956
Reina	6	2	4.41176	4.65116
SIRE	0	0	0	0
TAR	23	4	10.9005	0.466744
Tekay	1347	1070	22.6349	7.40946
Tork	1466	51	39.8153	2.2261
total	3520	1313	21.3217	4.41374

## Sheet: Stable3a
Stable3a. Accession information of all G. hirsutum varieties used for pangenome genotyping
Code	Accession name	SRR_code	Type
LR1TX0713_NC	TX0713	SRR6311890	LR1
LR1TX1066_CL	TX1066	SRR6311700	LR1
LR1TX1245_VN	TX1245	SRR6311613	LR1
LR1TX1367_VI	TX1367	SRR6311532	LR1
LR1TX1416_BR	TX1416	SRR6311602	LR1
LR1TX1514_VN	TX1514	SRR6311871	LR1
LR1TX1551_DM	TX1551	SRR6311604	LR1
LR1TX1572_DR	TX1572	SRR6311612	LR1
LR1TX1578_DR	TX1578	SRR6311813	LR1
LR1TX1582_HT	TX1582	SRR6311755	LR1
LR1TX1592_HT	TX1592	SRR6311758	LR1
LR1TX1594_HT	TX1594	SRR6311893	LR1
LR1TX1635_BB	TX1635	SRR6311803	LR1
LR1TX1666_VN	TX1666	SRR6311656	LR1
LR1TX1688_VN	TX1688	SRR6311773	LR1
LR1TX1689_VN	TX1689	SRR6311762	LR1
LR1TX1690_VN	TX1690	SRR6311529	LR1
LR1TX1694_VN	TX1694	SRR6311798	LR1
LR1TX1859_FR	TX1859	SRR6311760	LR1
LR1TX1874_BB	TX1874	SRR6311797	LR1
LR1TX1905_VN	TX1905	SRR6311528	LR1
LR1TX1935_CL	TX1935	SRR6311799	LR1
LR1TX1957_CL	TX1957	SRR6311766	LR1
LR1TX2207_NT	TX2207	SRR6311750	LR1
LR1TX2216_NT	TX2216	SRR6311806	LR1
LR1TX2226_JM	TX2226	SRR6311807	LR1
LR1TX2277_DR	TX2277	SRR6311595	LR1
LR1TX2284_PR	TX2284	SRR6311878	LR1
LR1TX2463_BR	TX2463	SRR6311753	LR1
LR1_B12TX2465_BR	TX2465	SRR6311600	LR2
LR1TX2482_BR	TX2482	SRR6311696	LR1
LR1TX2487_BR	TX2487	SRR6311752	LR1
LR1TX2489_BR	TX2489	SRR6311749	LR1
LR1TX2495_BR	TX2495	SRR6311872	LR1
LR2BPS1207_US	BPS1207	SRR6311490	LR2
LR2TX0014_MX	TX0014	SRR6311774	LR2
LR2TX0069_GM	TX0069	SRR6311808	LR2
LR2TX0112_GM	TX0112	SRR6311770	LR2
LR2TX0194_MX	TX0194	SRR6311545	LR2
LR2TX0215_GM	TX0215	SRR6311873	LR2
LR2TX0315_MX	TX0315	SRR6311526	LR2
LR2TX0390_SL	TX0390	SRR6311805	LR2
LR2TX0480_MX	TX0480	SRR6311548	LR2
LR2TX0481_MX	TX0481	SRR6311549	LR2
LR2TX0698_HN	TX0698	SRR6311601	LR2
LR2TX0751_MX	TX0751	SRR6311598	LR2
LR2TX0879_PR	TX0879	SRR6311699	LR2
LR2TX0937_CL	TX0937	SRR6311776	LR2
LR2TX0953_MX	TX0953	SRR6311838	LR2
LR2TX1055_MX	TX1055	SRR6311722	LR2
LR2TX1102_MX	TX1102	SRR6311801	LR2
LR2TX1108_MX	TX1108	SRR6311636	LR2
LR2TX1111_MX	TX1111	SRR6311759	LR2
LR2TX1182_MX	TX1182	SRR6311639	LR2
LR2TX1443_GM	TX1443	SRR6311525	LR2
LR2TX1459_MX	TX1459	SRR6311768	LR2
LR2TX1477_VN	TX1477	SRR6311611	LR2
LR2TX1721_CL	TX1721	SRR6311751	LR2
LR2TX1975_MX	TX1975	SRR6311875	LR2
LR2TX1981_MX	TX1981	SRR6311802	LR2
LR2TX2081_MX	TX2081	SRR6311702	LR2
LR2TX2089_MX	TX2089	SRR6311494	LR2
LR2TX2163_TT	TX2163	SRR6311483	LR2
LR2TX2228_JM	TX2228	SRR6311596	LR2
LR2TX2329_MX	TX2329	SRR6311885	LR2
LR2TX2405_BR	TX2405	SRR6311884	LR2
Wild_B12TX2211_netherlands	TX2211	SRR6311787	wild
Wild_B12TX1698_venezuela	TX1698	SRR6311879	wild
Wild_B12BPS1151_curacao	BPS1151	SRR6311622	wild
Wild_B12BPS1152_curacao	BPS1152	SRR6311486	wild
Wild_B12BPS1173_jamaica	BPS1173	SRR6311484	wild
Wild_B12BPS1206_unitedstates	BPS1206	SRR6311485	wild
Wild_B12BPS1244_puertorico	BPS1244	SRR6311625	wild
Wild_B12TX0967_jamaica	TX0967	SRR6311726	wild
Wild_B12TX1037_venezuela	TX1037	SRR6311707	wild
Wild_B12TX1678_venezuela	TX1678	SRR6311876	wild
Wild_B12TX1996_mexico	TX1996	SRR6311499	wild
Wild_B12TX2090_mexico	TX2090	SRR6311615	wild
Wild_B12TX2091_mexico	TX2091	SRR6311614	wild
Wild_B12TX2092_mexico	TX2092	SRR6311617	wild
Wild_B12TX2093_mexico	TX2093	SRR6311616	wild
Wild_B12TX2095_mexico	TX2095	SRR6311619	wild
Wild_B12TX2276_domrepublic	TX2276	SRR6311607	wild
Wild_FL_CPH_1	CPH_1	PRJNA1231560	wild
Wild_FL_CPH_2	CPH_2	PRJNA1231560	wild
Wild_FL_CPH_8	CPH_8	PRJNA1231560	wild
Wild_FL_CPT_10	CPT_10	PRJNA1231560	wild
Wild_FL_CPT_20	CPT_20	PRJNA1231560	wild
Wild_FL_CPT_3	CPT_3	PRJNA1231560	wild
Wild_FL_FMY_11	FMY_11	PRJNA1231560	wild
Wild_FL_FMY_15	FMY_15	PRJNA1231560	wild
Wild_FL_FMY_5	FMY_5	PRJNA1231560	wild
Wild_FL_MK_Pop1_10	Pop1_10	SRR28292550	wild
Wild_FL_MK_Pop2_1	Pop2_1	SRR28292563	wild
Wild_FL_NP_10	NP_10	PRJNA1231560	wild
Wild_FL_NP_14	NP_14	PRJNA1231560	wild
Wild_FL_NP_17	NP_17	PRJNA1231560	wild
Wild_FL_NP_4	NP_4	PRJNA1231560	wild
Wild_FL_OBP5_20	OBP5_20	PRJNA1231560	wild
Wild_FL_OPB2_10	OPB2_10	PRJNA1231560	wild
Wild_FL_OPB2_8	OPB2_8	PRJNA1231560	wild
Wild_FL_OPB4_12	OPB4_12	PRJNA1231560	wild
Wild_FL_OPB4_14	OPB4_14	PRJNA1231560	wild
Wild_FL_OPB4_15	OPB4_15	PRJNA1231560	wild
Wild_FL_OPB5_18	OPB5_18	PRJNA1231560	wild
Wild_FL_PK_1	PK_1	PRJNA1231560	wild
Wild_FL_RBD_1	RBD_1	PRJNA1231560	wild
Wild_FL_RBD_2	RBD_2	PRJNA1231560	wild
Wild_FL_RNRB_2	RNRB_2	PRJNA1231560	wild
Wild_FL_SR_1	SR_1	PRJNA1231560	wild
Wild_FL_SR_3	SR_3	PRJNA1231560	wild
Wild_FL_SR_5	SR_5	PRJNA1231560	wild
Wild_FL_TC_1	TC_1	PRJNA1231560	wild
Wild_FL_TC_11	TC_11	PRJNA1231560	wild
Wild_FL_TC_14	TC_14	PRJNA1231560	wild
Wild_FL_TC_2	TC_2	PRJNA1231560	wild
Wild_FL_TC_6	TC_6	PRJNA1231560	wild
Wild_FL_VKPA_2	VKPA_2	PRJNA1231560	wild
Wild_FL_VKPA_3	VKPA_3	PRJNA1231560	wild
Wild_FL_VKPA_5	VKPA_5	PRJNA1231560	wild
Wild_MK_Pop1_11	Pop1_11	SRR28292570	wild
Wild_MK_Pop1_15	Pop1_15	SRR28292572	wild
Wild_MK_Pop2_4	Pop2_4	SRR28292565	wild
Wild_MK_Pop2_7	Pop2_7	SRR28292558	wild
Wild_MK_Pop3_1	Pop3_1	SRR28292557	wild
Wild_PR_CR13	PR_CR13	SRR32429620	wild
Wild_PR_CR3	PR_CR3	SRR32429613	wild
Wild_PR_CR_10	PR_CR_10	SRR32429653	wild
Wild_PR_CR_11	PR_CR_11	SRR32429642	wild
Wild_PR_CR_1	PR_CR_1	SRR32429654	wild
Wild_PR_PR325_10	PR_PR325_10	SRR32429637	wild
Wild_PR_PR325_11	PR_PR325_11	SRR32429636	wild
Wild_PR_PR325_15	PR_PR325_15	SRR32429632	wild
Wild_PR_PR325_1	PR_PR325_1	SRR32429638	wild
Wild_PR_PR325_3	PR_PR325_3	SRR32429629	wild
Wild_PR_Ph_1	PR_Ph_1	SRR32429645	wild
Wild_PR_Ph_2	PR_Ph_2	SRR32429644	wild
Wild_PR_Ph_3	PR_Ph_3	SRR32429643	wild
Wild_PR_Ph_6	PR_Ph_6	SRR32429639	wild
cultB11DIV007_US	ACALA 1517D	SRR6311682	cultivated
cultB11DIV012_US	Acala 5	SRR6311585	cultivated
cultB11DIV033_US	AK-DJURA VIRESCENT	SRR6311582	cultivated
cultB11DIV037_US	ARIZONA RED	SRR6311580	cultivated
cultB11DIV042_US	Arkot 8102	SRR6311590	cultivated
cultB11DIV048_US	BLIGHTMASTER	SRR6311579	cultivated
cultB11DIV055_BL	BULGARIA 432	SRR6311578	cultivated
cultB11DIV063_US	FFJA	SRR6311591	cultivated
cultB11DIV066_US	CAHUGLBBCS-1-88	SRR6311584	cultivated
cultB11DIV074_US	CLEVELAND 54	SRR6311576	cultivated
cultB11DIV096_US	CS-8610	SRR6311644	cultivated
cultB11DIV106_US	Deltapine 14	SRR6311690	cultivated
cultB11DIV119_US	DELTAPINE SR383	SRR6311575	cultivated
cultB11DIV134_US	earlistaple 7	SRR6311643	cultivated
cultB11DIV136_US	empire	SRR6311642	cultivated
cultB11DIV138_US	EMPIRE WR	SRR6311574	cultivated
cultB11DIV141_US	express 121	SRR6311641	cultivated
cultB11DIV144_US	FJA	SRR6311648	cultivated
cultB11DIV176_US	H1220	SRR6311646	cultivated
cultB11DIV178_US	Half and Half	SRR6311645	cultivated
cultB11DIV184_US	Hopi Moencopi	SRR6311650	cultivated
cultB11DIV199_US	LANKART 311	SRR6311573	cultivated
cultB11DIV206_US	LBBCDBOAKH-1-90	SRR6311557	cultivated
cultB11DIV211_TT	M.U.8B UA 7-44	SRR6311555	cultivated
cultB11DIV226_US	MULTIPLE MARKER	SRR6311518	cultivated
cultB11DIV230_US	nC 88-95	SRR6311556	cultivated
cultB11DIV232_US	New Boykin	SRR6311561	cultivated
cultB11DIV243_US	PAYMASTER 266	SRR6311516	cultivated
cultB11DIV245_US	PaymasterHS200	SRR6311681	cultivated
cultB11DIV256_US	PD 2165	SRR6311554	cultivated
cultB11DIV260_US	PD4461Q	SRR6311513	cultivated
cultB11DIV272_US	PD 93030	SRR6311845	cultivated
cultB11DIV273_US	PD93034	SRR6311514	cultivated
cultB11DIV289_US	ROGERS LG10	SRR6311734	cultivated
cultB11DIV298_US	Auburn 634RNR	SRR6311848	cultivated
cultB11DIV306_US	Sealand #2	SRR6311847	cultivated
cultB11DIV307_US	SEALAND 7 WHITEFL	SRR6311792	cultivated
cultB11DIV308_US	Sealand #7 Yellow Flower	SRR6311850	cultivated
cultB11DIV310_US	SEALAND 472	SRR6311519	cultivated
cultB11DIV316_US	Southland M1	SRR6311849	cultivated
cultB11DIV322_US	Station Miller	SRR6311840	cultivated
cultB11DIV363_US	Tidewater 29	SRR6311686	cultivated
cultB11DIV366_US	Toole	SRR6311687	cultivated
cultB11DIV373_US	Wannamaker Cleveland	SRR6311689	cultivated
cultB11DIV380_US	Wilds 18	SRR6311688	cultivated
cultB11DIV382_US	WildS 34-4,T85 2	SRR6311794	cultivated
cultB11SA0084_US	FLORIDA SHORT STAPLE (hairy)	SRR6311821	cultivated
cultB11SA0159_TT	TIPO CHACO UA 4-4	SRR6311842	cultivated
cultB11SA0165_TT	M.U. 3 UA 7-41	SRR6311718	cultivated
cultB11SA0186_TT	FELISTANA UA-7-18	SRR6311717	cultivated
cultB11SA0238_US	ACALA 1064 (NEW MEXICO)	SRR6311716	cultivated
cultB11SA0298_US	WONDER WILT WANNAMAKER'S	SRR6311715	cultivated
cultB11SA0300_US	ROWDEN #2	SRR6311714	cultivated
cultB11SA0311_US	AMBASSADOR (4B6)	SRR6311713	cultivated
cultB11SA0582_TK	CB 2525	SRR6311710	cultivated
cultB11SA0718_US	ARKANSAS 11 NUCALA X ROWDEN 20-4-	SRR6311824	cultivated
cultB11SA0815_MX	MEXICAN #68	SRR6311825	cultivated
cultB11SA0825_MX	MEXICAN #102	SRR6311822	cultivated
cultB11SA0857_US	ACALA ORIGINAL	SRR6311823	cultivated
cultB11SA0881_US	MISSDEL	SRR6311828	cultivated
cultB11SA0892_US	MEBANE	SRR6311826	cultivated
cultB11SA0940_GR	PI 194849 53 D4	SRR6311819	cultivated
cultB11SA0982_SA	5143	SRR6311536	cultivated
cultB11SA1019_US	WESTERN STORMPROOF	SRR6311538	cultivated
cultB11SA1044_US	STORM KING T.P.S.A. NO. 41	SRR6311537	cultivated
cultB11SA1138_US	RILCOT 90	SRR6311542	cultivated
cultB11SA1139_US	PAYMASTER 54 B	SRR6311541	cultivated
cultB11SA1156_US	DEKALB 220	SRR6311534	cultivated
cultB11SA1181_US	ACALA SJ-1	SRR6311569	cultivated
cultB11SA1184_US	COKER 310	SRR6311570	cultivated
cultB11SA1205_US	CB 4012 KING KARAJAZSY	SRR6311571	cultivated
cultB11SA1263_UG	ALBACALA 7	SRR6311563	cultivated
cultB11SA1330_CH	REBA P 279 (REBA B-50 X DPL SMO.)	SRR6311675	cultivated
cultB11SA1349_BR	IAC 18	SRR6311674	cultivated
cultB11SA1392_UZ	TASHKENT I	SRR6311673	cultivated
cultB11SA1403_AZ	3010	SRR6311680	cultivated
cultB11SA1456_US	HOPI JONES 79-4473	SRR6311782	cultivated
cultB11SA1465_US	DES 422	SRR6311779	cultivated
cultB11SA1533_US	LOCKETT BXL	SRR6311780	cultivated
cultB11SA1596_US	PD 2	SRR6311777	cultivated
cultB11SA1665_US	PD 6208 (FORMALY PD-3)	SRR6311785	cultivated
cultB11SA1710_US	TAM 87N-5	SRR6311818	cultivated
cultB11SA1759_AG	CHACO 510 INTA	SRR6311501	cultivated
cultB11SA1766_SL	CEDIX	SRR6311496	cultivated
cultB11SA1913_US	S.N. 8306	SRR6311498	cultivated
cultB11SA2057_US	S.N. 9309	SRR6311497	cultivated
cultB11SA2149_US	BYU11149	SRR6311606	cultivated
cultB11SA2192_US	BYU11150	SRR6311605	cultivated
cultB11SA2269_US	TM1	SRR6311507	cultivated
cultB11SA2356_NG	FUNTUA FT-5	SRR6311732	cultivated
cultB11SA2401_US	TAM 2562 RKNR	SRR6311735	cultivated
cultB11SA2580_US	ACALA 1517-99	SRR6311737	cultivated
cultB11SA2910_US	TAM 91C-34	SRR6311857	cultivated
cultB11SA3251_MX	VIR-6609 PRECOZ-OK-86	SRR6311854	cultivated
cultB11SA3284_MX	VIR-6654 SAC-24-4	SRR6311852	cultivated
cultB11SA3332_CM	VIR-7064 ALLEN-151	SRR6311860	cultivated
cultB11SA3338_US	VIR-7070-1 LAMBRIGHT gz-5	SRR6311870	cultivated
cultB11SA3403_US	VIR-7137 COKER 201	SRR6311865	cultivated
cultB11SA3413_BN	VIR-7153 D-10	SRR6311864	cultivated
cultB11SA3444_MD	VIR-7223 ?	SRR6311863	cultivated
cultB11SA3452_BN	VIR-7231 DEF-1	SRR6311862	cultivated
cultB11SA3493_US	RN96625-1 (USDA/ARS FOREST ROBINSON)	SRR6311740	cultivated
cultB11SA3748_US	STONEVILLE 256	SRR6311741	cultivated
cultB11SA3749_US	STONEVILLE 453	SRR6311742	cultivated
cultB11SA3781_US	ACALA ROYALE	SRR6311745	cultivated
cultP111240RNR_US	M-240RNR	SRR1536363	cultivated
cultP111DP5690_US	Deltapine-5690	SRR1975548	cultivated
cultP111FM832_US	Fibermax-832	SRR1536364	cultivated
cultP111Maxxa_US	Acala Maxxa	SRR617482	cultivated
cultP111PD1_US	PD-1	SRR1534918	cultivated
cultP111SG747_US	SureGrow-747	SRR1536366	cultivated
cultP111SL542_US	Sealand-542	SRR1534862	cultivated
cultP111ST474_US	Stoneville-474	SRR1536367	cultivated
cultP111TamSph_US	Tamcot sphinx	SRR1536368	cultivated
cultP111TM1_US	Texas Marker-1	SRR1534688	cultivated
cultP115HAU033_CN	Xinluzao8	SRR4006667	cultivated
cultP115HAU041_CN	Emian3	SRR4006675	cultivated
cultP115HAU043_CN	Emian9	SRR4006677	cultivated
cultP115HAU047_CN	Jinmian11	SRR4008910	cultivated
cultP115HAU059_CN	Xuzhou142	SRR4006691	cultivated
cultP115HAU066_CN	Sumian8	SRR4006698	cultivated
cultP115HAU084_CN	Wanmian73-10	SRR4006721	cultivated
cultP115HAU085_CN	86-1	SRR4006722	cultivated
cultP115HAU094_CN	Zhongmiansuo40	SRR4006732	cultivated
cultP115HAU101_CN	Ganmian10	SRR4013321	cultivated
cultP115HAU110_CN	Zhongmiansuo49	SRR4013330	cultivated
cultP115HAU114_CN	52-128	SRR4013617	cultivated
cultP115HAU124_CN	Changrong1	SRR4013627	cultivated
cultP115HAU132_CN	Dexiamian1	SRR4013875	cultivated
cultP115HAU137_CN	Ganmian1	SRR4013888	cultivated
cultP115HAU146_CN	Huadong6	SRR4013897	cultivated
cultP115HAU148_CN	Jimian958	SRR4013899	cultivated
cultP115HAU153_CN	Jimian15	SRR4014011	cultivated
cultP115HAU163_CN	Jinmian2	SRR4014023	cultivated
cultP115HAU176_CN	Keyi181	SRR4018442	cultivated
cultP115HAU185_CN	Liaoyangduanjie	SRR4018457	cultivated
cultP115HAU218_CN	Sumian22	SRR4018552	cultivated
cultP115HAU223_CN	Xinlu201	SRR4018557	cultivated
cultP115HAU224_CN	Xinluzao4	SRR4018558	cultivated
cultP115HAU242_CN	Yumian5	SRR4018588	cultivated
cultP115HAU246_CN	Yuwu19	SRR4018592	cultivated
cultP115HAU279_CN	XuzhouGD-3	SRR4018980	cultivated
cultP115HU018_US	Stoneville4B	SRR4006036	cultivated
cultP115HU089_US	Stoneville4	SRR4006726	cultivated
cultP115HU117_US	NC20B	SRR4013620	cultivated
cultP115HU130_US	Deltapine14	SRR4013633	cultivated
cultP115HU131_US	Deltapine16	SRR4013850	cultivated
cultP115HU141_US	Guangyedaizimian	SRR4013892	cultivated
cultP115HU268_US	TM-1	SRR4018969	cultivated
cultP115HU271_US	T586	SRR4018972	cultivated
cultP117DP15_US	Deltapine 15	SRR5512448	cultivated

## Sheet: Stable3b
Stable3b. Accession information of all G. barbadense varieties used for pangenome genotyping
SRA_code	Library ID	Accession name	Type
SRX3433725	BYU21006	B21TX2350	Cultivar
SRX3433728	BYU21005	B21SA1497	Cultivar
SRX3433729	BYU21003	B21PS7	Cultivar
SRX3433803	BYU21001	B21GB0853	Cultivar
SRX3433866	BYU21002	B21PHY76-2	Cultivar
SRX996764	PL211016	P211GB0236	Cultivar
SRX996775	PL211027	P211DP0340	Cultivar
SRX996776	PL211028	P211PHY76	Cultivar
SRS705640	PL216087	P2165904И	Cultivar
SRS705641	PL216088	P2168763И	Cultivar
SRS705644	PL216091	P216CCCP 1243	Cultivar
SRS705650	PL216097	P2169899-I	Cultivar
SRS705651	PL216098	P216Buhara ZTW	Cultivar
SRS705652	PL216099	P216VIR-29TV	Cultivar
SRS705653	PL216100	P216VIR-4TV	Cultivar
SRS705657	PL216104	P216Giza 36	Cultivar
SRS705676	PL216123	P216Tuhai 2#	Cultivar
SRS705677	PL216124	P216Yuejin 1#	Cultivar
SRS705639	PL216086	P216UN	Cultivar
SRS705642	PL216089	P216910И	Cultivar
SRS705643	PL216090	P216Ba3119	Cultivar
SRS705645	PL216092	P216CCCP B154 (91-486)	Cultivar
SRS705646	PL216093	P216CCCP B51	Cultivar
SRS705647	PL216094	P216CCCP B9102	Cultivar
SRS705648	PL216095	P216DJ-07-136	Cultivar
SRS705649	PL216096	P216K388	Cultivar
SRS705654	PL216101	P216Coastland R4-4	Cultivar
SRS705656	PL216103	P216Giza 29	Cultivar
SRS705658	PL216105	P216Giza 67	Cultivar
SRS705659	PL216106	P216Giza 80	Cultivar
SRS705662	PL216109	P216Pima S-1	Cultivar
SRS705663	PL216110	P216Pima S-2	Cultivar
SRS705664	PL216111	P216Pima S-4	Cultivar
SRS705670	PL216117	P216Changrong 3#	Cultivar
SRS705671	PL216118	P216Changrong 5#	Cultivar
SRS705672	PL216119	P216Hai7124	Cultivar
SRS705673	PL216120	P216Hai 92-138	Cultivar
SRS705674	PL216121	P216JunH1	Cultivar
SRS705675	PL216122	P216Shengli 1#	Cultivar
SRS705679	PL216126	P216Xinhai 3#	Cultivar
SRS705680	PL216127	P216Xinhai 5#	Cultivar
SRS705681	PL216128	P216Xinhai 10#	Cultivar
SRS705682	PL216129	P216Xinhai 11#	Cultivar
SRS705683	PL216130	P216Xinhai 13#	Cultivar
SRS705684	PL216131	P216Xinhai 16#	Cultivar
SRS705685	PL216132	P216Xinhai 21#	Cultivar
SRS705686	PL216133	P216Xinhai 25#	Cultivar
SRS705687	PL216134	P216Xinhai 29#	Cultivar
SRS705688	PL216135	P216Xinhai 2#	Cultivar
SRS705689	PL216136	P216Xinhai 33#	Cultivar
SRX3433835	BYU21004	B21SA0706	Cultivar*
SRX3433685	BYU21080	B21GB0254	Improved
SRX3433686	BYU21081	B21GB0255	Improved
SRX3433688	BYU21079	B21GB0252	Improved
SRX3433689	BYU21076	B21GB0245	Improved
SRX3433690	BYU21077	B21GB0249	Improved
SRX3433691	BYU21074	B21GB0238	Improved
SRX3433692	BYU21075	B21GB0242	Improved
SRX3433693	BYU21082	B21GB0258	Improved
SRX3433701	BYU21175	B21GB1483	Improved
SRX3433702	BYU21176	B21GB1512	Improved
SRX3433703	BYU21177	B21GB1513	Improved
SRX3433732	BYU21171	B21GB1465	Improved
SRX3433733	BYU21170	B21GB1464	Improved
SRX3433736	BYU21167	B21GB1449	Improved
SRX3433738	BYU21165	B21GB1439	Improved
SRX3433739	BYU21164	B21GB1438	Improved
SRX3433740	BYU21173	B21GB1480	Improved
SRX3433754	BYU21117	B21GB0461	Improved
SRX3433759	BYU21118	B21GB0467	Improved
SRX3433763	BYU21156	B21GB1084	Improved
SRX3433764	BYU21157	B21GB1086	Improved
SRX3433767	BYU21160	B21GB1383	Improved
SRX3433768	BYU21161	B21GB1384	Improved
SRX3433769	BYU21158	B21GB1329	Improved
SRX3433770	BYU21159	B21GB1336	Improved
SRX3433772	BYU21163	B21GB1388	Improved
SRX3433774	BYU21068	B21GB0212	Improved
SRX3433776	BYU21070	B21GB0224	Improved
SRX3433789	BYU21066	B21GB0204	Improved
SRX3433793	BYU21146	B21GB0785	Improved
SRX3433795	BYU21148	B21GB0805	Improved
SRX3433799	BYU21152	B21GB1031	Improved
SRX3433813	BYU21143	B21GB0739	Improved
SRX3433814	BYU21138	B21GB0657	Improved
SRX3433815	BYU21139	B21GB0660	Improved
SRX3433816	BYU21140	B21GB0662	Improved
SRX3433817	BYU21141	B21GB0683	Improved
SRX3433819	BYU21135	B21GB0649	Improved
SRX3433832	BYU21133	B21GB0647	Improved
SRX3433853	BYU21144	B21GB0740	Improved
SRX3433672	BYU21073	B21GB0232	Improved*
SRX3433673	BYU21072	B21GB0230	Improved*
SRX3433687	BYU21078	B21GB0251	Improved*
SRX3433700	BYU21174	B21GB1482	Improved*
SRX3433734	BYU21169	B21GB1462	Improved*
SRX3433735	BYU21168	B21GB1459	Improved*
SRX3433737	BYU21166	B21GB1444	Improved*
SRX3433741	BYU21172	B21GB1468	Improved*
SRX3433766	BYU21155	B21GB1069	Improved*
SRX3433771	BYU21162	B21GB1386	Improved*
SRX3433773	BYU21069	B21GB0220	Improved*
SRX3433775	BYU21071	B21GB0227	Improved*
SRX3433792	BYU21147	B21GB0790	Improved*
SRX3433796	BYU21151	B21GB1027	Improved*
SRX3433812	BYU21142	B21GB0720	Improved*
SRX3433818	BYU21134	B21GB0648	Improved*
SRX3433821	BYU21137	B21GB0655	Improved*
SRX3433825	BYU21049	B21GB0093	Improved*
SRX3433828	BYU21046	B21GB0085	Improved*
SRX3433845	BYU21067	B21GB0211	Improved*
SRX3433677	BYU22039	B22LB	Wild
SRX3433683	BYU50004	B50AD5-OP	Wild
SRX3433684	BYU22037	B22GPS005	Wild
SRX3433694	BYU22083	B22GB0262	Wild
SRX3433695	BYU22105	B22GB0376	Wild
SRX3433697	BYU22180	B22GB0427-2	Wild
SRX3433698	BYU22181	B22GB0618-2	Wild
SRX3433699	BYU22106	B22GB0377	Wild
SRX3433706	BYU22178	B22GB0287-2	Wild
SRX3433707	BYU22179	B22GB0414-2	Wild
SRX3433708	BYU22111	B22GB0428	Wild
SRX3433710	BYU22110	B22GB0426	Wild
SRX3433711	BYU22087	B22GB0278	Wild
SRX3433712	BYU22086	B22GB0275	Wild
SRX3433713	BYU22085	B22GB0273	Wild
SRX3433714	BYU22084	B22GB0264	Wild
SRX3433715	BYU22091	B22GB0309	Wild
SRX3433716	BYU22090	B22GB0307	Wild
SRX3433717	BYU22089	B22GB0303	Wild
SRX3433718	BYU22088	B22GB0281	Wild
SRX3433720	BYU22092	B22GB0313	Wild
SRX3433723	BYU22104	B22GB0371	Wild
SRX3433730	BYU22113	B22GB0430	Wild
SRX3433742	BYU22063	B22GB0183	Wild
SRX3433743	BYU22102	B22GB0359	Wild
SRX3433745	BYU22098	B22GB0339	Wild
SRX3433746	BYU22099	B22GB0348	Wild
SRX3433747	BYU22100	B22GB0349	Wild
SRX3433748	BYU22101	B22GB0358	Wild
SRX3433749	BYU22094	B22GB0320	Wild
SRX3433753	BYU22116	B22GB0457	Wild
SRX3433755	BYU22114	B22GB0434	Wild
SRX3433756	BYU22115	B22GB0440	Wild
SRX3433757	BYU22120	B22GB0517	Wild
SRX3433758	BYU22121	B22GB0524	Wild
SRX3433761	BYU22122	B22GB0533	Wild
SRX3433762	BYU22123	B22GB0536	Wild
SRX3433765	BYU22154	B22GB1067	Wild
SRX3433777	BYU22065	B22GB0193	Wild
SRX3433778	BYU22064	B22GB0192	Wild
SRX3433780	BYU22182	B22NCM14-31	Wild
SRX3433781	BYU22040	B22NC7018	Wild
SRX3433782	BYU22007	B22OLG-10	Wild
SRX3433783	BYU22008	B22OLG-11	Wild
SRX3433784	BYU22009	B22OLG-12	Wild
SRX3433785	BYU22010	B22OLG-13	Wild
SRX3433786	BYU22011	B22OLG-14	Wild
SRX3433787	BYU22012	B22OLG-15	Wild
SRX3433788	BYU22013	B22OLG-17	Wild
SRX3433794	BYU22149	B22GB0816	Wild
SRX3433797	BYU22150	B22GB0864	Wild
SRX3433798	BYU22153	B22GB1063	Wild
SRX3433800	BYU22043	B22GB0051	Wild
SRX3433801	BYU22044	B22GB0052	Wild
SRX3433802	BYU50003	B50AD5-PW	Wild
SRX3433804	BYU50001	B50AD5-2	Wild
SRX3433805	BYU50002	B50AD5-CB	Wild
SRX3433807	BYU22042	B22GB0049	Wild
SRX3433811	BYU22055	B22GB0136	Wild
SRX3433820	BYU22136	B22GB0651	Wild
SRX3433822	BYU22051	B22GB0102	Wild
SRX3433823	BYU22038	B22K101	Wild
SRX3433824	BYU22050	B22GB0095	Wild
SRX3433826	BYU22048	B22GB0091	Wild
SRX3433829	BYU22045	B22GB0053	Wild
SRX3433833	BYU22132	B22GB0636	Wild
SRX3433834	BYU22109	B22GB0394	Wild
SRX3433838	BYU22125	B22GB0569	Wild
SRX3433840	BYU22131	B22GB0631	Wild
SRX3433841	BYU22130	B22GB0623	Wild
SRX3433843	BYU22128	B22GB0594	Wild
SRX3433847	BYU22145	B22GB0776	Wild
SRX3433848	BYU22056	B22GB0140	Wild
SRX3433849	BYU22057	B22GB0144	Wild
SRX3433850	BYU22058	B22GB0156	Wild
SRX3433852	BYU22060	B22GB0169	Wild
SRX3433855	BYU22017	B22OLG-04	Wild
SRX3433857	BYU22016	B22OLG-03	Wild
SRX3433867	BYU22020	B22OLG-08	Wild
SRX3433868	BYU22019	B22OLG-06	Wild
SRX3433872	BYU22015	B22OLG-02	Wild
SRX3433873	BYU22014	B22OLG-18	Wild
SRX996763	PL221015	P221GB0074	Wild
SRX996765	PL221017	P221GB0287	Wild
SRX996768	PL221020	P221GB0369	Wild
SRX996769	PL221021	P221GB0385	Wild
SRX996770	PL221022	P221GB0398	Wild
SRX996771	PL221023	P221GB0411	Wild
SRX996772	PL221024	P221GB0414	Wild
SRX996773	PL221025	P221GB0427	Wild
SRX996774	PL221026	P221GB0618	Wild
SRX996779	PL501031	P501AD5	Wild (darwinii)
SRX3433696	BYU22107	B22GB0382	Wild*
SRX3433709	BYU22061	B22GB0176	Wild*
SRX3433719	BYU22093	B22GB0314	Wild*
SRX3433731	BYU22112	B22GB0429	Wild*
SRX3433744	BYU22103	B22GB0361	Wild*
SRX3433752	BYU22097	B22GB0337	Wild*
SRX3433760	BYU22119	B22GB0489	Wild*
SRX3433806	BYU22041	B22GB0034	Wild*
SRX3433809	BYU22036	B22NCM-1	Wild*
SRX3433827	BYU22047	B22GB0087	Wild*
SRX3433830	BYU22053	B22GB0119	Wild*
SRX3433831	BYU22052	B22GB0113	Wild*
SRX3433836	BYU22127	B22GB0593	Wild*
SRX3433837	BYU22126	B22GB0571	Wild*
SRX3433839	BYU22124	B22GB0542	Wild*
SRX3433842	BYU22129	B22GB0600	Wild*
SRX3433844	BYU22108	B22GB0386	Wild*
SRX3433846	BYU22054	B22GB0128	Wild*
SRX3433851	BYU22059	B22GB0167	Wild*
SRX3433854	BYU22062	B22GB0181	Wild*

## Sheet: Stable4
Stable4. Numbers of TIPs shared across the three groups of accessions used for genotyping (wild, landrace and domesticated)
	G. hirsutum	G. barbadense
Cultivar-Landrace shared	218	49
Cultivar-Wild shared	137	174
Landrace-Wild shared	383	24
Cultivar-specific	34	23
Landrace-specific	15	1
Wild-specific	95	7
Missing across all	99	76
Shared across all	5860	4450

## Sheet: Stable5a
TableS5a. TIPs with high PBS, associated TE lineages and genes nearby in G. hirsutum
High PBS in Cultivated vs wild/landrace			High PBS in wild vs cultivated/landraces
TIP	family	gene	TIP	family	gene
A01_104493296	Gypsy_Tekay	NA	A01_103451317	Gypsy_Tekay	NA
A01_15290064	Copia_Tork	NA	A01_110666688	Gypsy_Tekay	NA
A01_1579908	Copia_Tork	NA	A01_21633210	Copia_Tork	Gh_A01G114800
A01_2517832	Copia_Tork	Gh_A01G027400	A01_23631437	Gypsy_Tekay	NA
A01_31245074	Copia_Tork	Gh_A01G128800	A01_25318276	Gypsy_Tekay	NA
A01_3977465	Copia_Ivana	Gh_A01G039500	A01_34583022	Gypsy_Tekay	NA
A01_44342531	Gypsy_Tekay	NA	A01_34605939	Gypsy_Tekay	NA
A01_52587712	Gypsy_Tekay	NA	A01_35489124	Gypsy_Tekay	NA
A01_54819174	Gypsy_Tekay	NA	A01_36050831	Gypsy_Tekay	NA
A01_55282995	Gypsy_Tekay	NA	A01_36189038	Gypsy_Tekay	NA
A01_62342545	Gypsy_Tekay	NA	A01_36988145	Gypsy_Tekay	NA
A01_73476974	Gypsy_Tekay	NA	A01_37254252	Gypsy_Tekay	NA
A01_73747836	Gypsy_Tekay	NA	A01_37536375	Gypsy_Galadriel	NA
A01_73784362	Gypsy_Tekay	NA	A01_38327210	Gypsy_Tekay	NA
A01_76385272	Gypsy_Tekay	NA	A01_38352440	Gypsy_Tekay	NA
A01_76769767	Gypsy_Tekay	NA	A01_38602931	Gypsy_Tekay	NA
A01_77298266	Gypsy_Tekay	NA	A01_39218586	Gypsy_Tekay	NA
A01_78928733	Copia_Ivana	NA	A01_39328074	Gypsy_Tekay	NA
A01_79841666	Gypsy_Tekay	NA	A01_39809072	Gypsy_Tekay	NA
A01_87182852	Gypsy_Tekay	NA	A01_44778939	Gypsy_Tekay	NA
A01_8729273	Copia_Tork	NA	A01_44908182	Gypsy_Tekay	NA
A01_88633544	Gypsy_Tekay	NA	A01_45247247	Gypsy_Tekay	NA
A01_89631325	Gypsy_Tekay	NA	A01_45349276	Gypsy_Tekay	NA
A01_91865615	Gypsy_Tekay	NA	A01_45746748	Gypsy_Tekay	NA
A02_100369631	Copia_Ivana	NA	A01_46106699	Gypsy_Tekay	NA
A02_103129447	Copia_Tork	NA	A01_46615872	Gypsy_Tekay	NA
A02_16625338	Gypsy_Tekay	NA	A01_52991129	Gypsy_Tekay	NA
A02_84697259	Copia_Tork	Gh_A02G146900	A01_53050353	Gypsy_Tekay	NA
A03_10887000	Copia_Tork	NA	A01_53652935	Gypsy_Tekay	NA
A03_109191327	Copia_Tork	NA	A01_55876341	Gypsy_Tekay	NA
A03_109836016	Copia_Tork	Gh_A03G245400	A01_58373657	Gypsy_Tekay	NA
A03_7782160	Copia_Tork	NA	A01_58402854	Gypsy_Tekay	NA
A03_86661421	Copia_Ivana	NA	A01_58922611	Gypsy_Tekay	NA
A03_9208219	Copia_Ivana	Gh_A03G058500	A01_59544215	Gypsy_Tekay	NA
A03_9208219	Copia_Ivana	Gh_A03G058600	A01_61188797	Gypsy_Tekay	NA
A03_9446862	Copia_Tork	Gh_A03G059400	A01_61431273	Gypsy_Tekay	NA
A04_1631264	Copia_Ale	Gh_A04G014600	A01_61519531	Gypsy_Tekay	NA
A04_76678019	Gypsy_Tekay	NA	A01_62200724	Gypsy_Tekay	NA
A05_101339069	Copia_Ivana	Gh_A05G377500	A01_63473533	Gypsy_Tekay	NA
A05_40032318	Gypsy_Tekay	NA	A01_63874546	Gypsy_Tekay	NA
A05_42675835	Gypsy_Tekay	NA	A01_64261259	Gypsy_Tekay	NA
A05_42696725	Gypsy_Tekay	NA	A01_64306298	Gypsy_Tekay	NA
A05_42919771	Copia_Tork	NA	A01_64352075	Gypsy_Tekay	NA
A05_6680606	Copia_Tork	Gh_A05G056800	A01_65129146	unknown_CRM	NA
A05_6852329	Copia_Tork	Gh_A05G059200	A01_65435324	unknown_CRM	NA
A05_7706227	Copia_Tork	NA	A01_66726190	Gypsy_CRM	NA
A05_99824128	Gypsy_Tekay	NA	A01_67072670	Gypsy_Tekay	NA
A06_10667982	Copia_Ivana	Gh_A06G063500	A01_68322315	Gypsy_Tekay	NA
A06_115787025	Copia_Tork	Gh_A06G179000	A01_68494393	Gypsy_Tekay	NA
A06_115887239	Gypsy_Ogre	NA	A01_68687041	Gypsy_Tekay	NA
A06_13322091	Gypsy_Tekay	NA	A01_6982073	Copia_Tork	Gh_A01G057200
A06_14331482	Gypsy_Tekay	NA	A01_6982073	Copia_Tork	Gh_A01G057300
A06_16032581	Gypsy_Tekay	NA	A01_71790264	Gypsy_Tekay	NA
A06_21683878	Gypsy_Tekay	NA	A01_72226281	Gypsy_Tekay	NA
A06_2444106	Gypsy_Ogre	NA	A01_72462715	Gypsy_Tekay	NA
A06_3173695	Copia_Tork	NA	A01_72903558	Gypsy_Tekay	NA
A06_35470878	Copia_Ale	Gh_A06G109000	A01_75438037	Gypsy_Tekay	NA
A06_35611332	Gypsy_Tekay	NA	A01_75966029	Gypsy_Tekay	NA
A06_35662453	Gypsy_Tekay	NA	A01_7678021	Copia_Tork	Gh_A01G061500
A06_38366290	Gypsy_Tekay	NA	A01_76990285	Gypsy_Tekay	NA
A06_41073478	Gypsy_Tekay	NA	A01_78724298	Gypsy_Tekay	NA
A06_41830076	unknown_Tekay	NA	A01_8663278	Copia_Tork	Gh_A01G068200
A06_64392763	Gypsy_Tekay	NA	A01_92208881	Gypsy_Tekay	Gh_A01G174600
A06_65274529	Gypsy_Tekay	NA	A02_16625338	Gypsy_Tekay	NA
A06_66575211	Gypsy_Tekay	NA	A02_1872089	Copia_Tork	Gh_A02G019800
A06_66686682	Gypsy_Tekay	NA	A02_4107647	Copia_Tork	Gh_A02G040700
A06_67333081	Gypsy_Tekay	NA	A03_109215568	Copia_Ivana	Gh_A03G236400
A06_67609523	Gypsy_Tekay	NA	A03_109215568	Copia_Ivana	Gh_A03G236500
A06_69559859	Copia_Ivana	Gh_A06G132800	A03_67807854	Gypsy_Tekay	NA
A06_76811420	Gypsy_Tekay	NA	A03_7782160	Copia_Tork	NA
A06_77082639	Gypsy_Tekay	NA	A05_13113379	Copia_Tork	Gh_A05G123000
A06_8361526	Copia_Tork	NA	A05_13242189	Gypsy_Tekay	NA
A06_8608154	Copia_Tork	NA	A05_32505805	Gypsy_Tekay	NA
A06_93254298	Gypsy_Tekay	NA	A05_596361	Gypsy_Tekay	NA
A06_93621534	Gypsy_Tekay	NA	A05_654667	unknown_CRM	NA
A07_19009524	Copia_Tork	NA	A06_104040506	Gypsy_Tekay	NA
A07_46747812	Gypsy_Tekay	NA	A06_10667982	Copia_Ivana	Gh_A06G063500
A07_46808505	Gypsy_Tekay	NA	A06_111300176	Gypsy_Tekay	NA
A07_48859916	Gypsy_Tekay	NA	A06_112416615	Gypsy_Tekay	NA
A07_50625978	Gypsy_Tekay	NA	A06_13322091	Gypsy_Tekay	NA
A07_50918190	Gypsy_Tekay	NA	A06_14309249	Gypsy_Tekay	NA
A07_54839873	Copia_Tork	Gh_A07G183500	A06_14430844	Copia_Tork	NA
A07_62442038	Gypsy_Tekay	NA	A06_2444106	Gypsy_Ogre	NA
A07_66083342	Gypsy_Tekay	NA	A06_35662453	Gypsy_Tekay	NA
A07_68733047	Gypsy_Tekay	NA	A06_36785291	Gypsy_Tekay	NA
A07_69907953	Gypsy_Tekay	NA	A06_36959265	Gypsy_Tekay	NA
A07_72401678	Gypsy_Tekay	NA	A06_40130426	Gypsy_Tekay	NA
A07_72471722	Gypsy_Tekay	NA	A06_40204039	Gypsy_Tekay	NA
A07_75533112	Gypsy_Tekay	NA	A06_64831162	Gypsy_Tekay	NA
A07_75918466	Gypsy_Tekay	NA	A06_72343954	Copia_Ivana	Gh_A06G134400
A07_7721390	Copia_Tork	NA	A06_72823376	Gypsy_Tekay	NA
A07_80292347	Gypsy_Tekay	NA	A06_75975120	Gypsy_Tekay	NA
A07_82354749	Gypsy_Tekay	NA	A06_77136975	Gypsy_Tekay	NA
A07_82538691	Gypsy_Tekay	Gh_A07G200600	A06_77866047	Copia_Ivana	Gh_A06G140000
A08_104067955	Gypsy_Tekay	NA	A06_78145786	Gypsy_Tekay	NA
A08_120426208	Copia_Tork	Gh_A08G236200	A06_80185015	Gypsy_Tekay	NA
A08_121578687	Copia_Tork	NA	A06_80194447	Gypsy_Tekay	NA
A08_124416223	Gypsy_Ogre	Gh_A08G275900	A06_80281676	unknown_Tekay	NA
A08_124698335	Copia_Tork	Gh_A08G279500	A06_83479081	Gypsy_Tekay	NA
A08_13104681	Gypsy_Tekay	Gh_A08G077900	A06_8493568	Copia_Tork	Gh_A06G055300
A08_13104681	Gypsy_Tekay	Gh_A08G078000	A06_86344610	Gypsy_Tekay	NA
A08_85438	Gypsy_CRM	Gh_A08G000300	A06_86420240	Gypsy_Tekay	NA
A09_4063509	Gypsy_Tekay	NA	A06_86582117	Gypsy_Tekay	NA
A09_5585274	Copia_Tork	NA	A06_86926375	Gypsy_Tekay	NA
A09_65814682	Copia_Tork	NA	A06_87266745	Gypsy_Tekay	NA
A09_73491818	Copia_Ivana	Gh_A09G167200	A06_87293024	Gypsy_Tekay	NA
A09_80374776	Gypsy_Tekay	Gh_A09G237900	A06_87554601	Gypsy_Tekay	NA
A10_109930756	Copia_Tork	NA	A06_87747417	Gypsy_Tekay	NA
A10_15804167	Copia_Tork	NA	A06_88887990	Gypsy_Tekay	NA
A10_27462881	Gypsy_CRM	Gh_A10G101100	A06_90914646	Gypsy_Tekay	NA
A10_33084577	Gypsy_Tekay	NA	A06_93105243	Gypsy_Tekay	NA
A10_33255364	Gypsy_Tekay	NA	A06_96315401	Gypsy_Tekay	Gh_A06G152600
A10_33343458	Gypsy_Tekay	NA	A06_99649420	Gypsy_Tekay	NA
A10_33446040	Gypsy_Tekay	NA	A07_18607736	Copia_Ivana	NA
A10_58443419	Gypsy_Tekay	NA	A07_31522147	Gypsy_Tekay	NA
A10_58539314	Gypsy_Tekay	NA	A07_33323458	Gypsy_Tekay	NA
A10_58958361	Gypsy_Tekay	NA	A07_80292347	Gypsy_Tekay	NA
A10_6747892	Copia_Tork	NA	A07_82264601	Gypsy_Tekay	NA
A10_86665140	Gypsy_Tekay	NA	A07_82354749	Gypsy_Tekay	NA
A11_110486219	Copia_Tork	NA	A07_83720944	Gypsy_Galadriel	NA
A11_111207830	Copia_Tork	NA	A07_85062094	Gypsy_Tekay	NA
A11_111383385	Copia_Ivana	Gh_A11G322100	A07_85440534	Gypsy_Tekay	NA
A11_112094412	Copia_Tork	NA	A09_5482831	Copia_Ivana	NA
A11_112354897	Copia_Ivana	NA	A09_60562068	Copia_Tork	Gh_A09G097300
A11_113781924	Copia_Tork	NA	A09_8347552	Copia_Ale	Gh_A09G032700
A11_118921275	Copia_Tork	Gh_A11G372600	A10_11229196	Gypsy_Tekay	NA
A11_2195472	Copia_Tork	Gh_A11G026700	A10_16420816	Gypsy_Galadriel	NA
A11_53411233	Gypsy_Tekay	NA	A10_17248325	Copia_Tork	NA
A11_61754416	Gypsy_Tekay	NA	A10_18687455	Copia_TAR	NA
A11_62573652	Gypsy_Tekay	NA	A10_18862816	unknown_CRM	Gh_A10G084300
A11_62972927	Gypsy_Tekay	NA	A10_4700474	Gypsy_Tekay	Gh_A10G042000
A11_87841718	Gypsy_Tekay	NA	A10_70024161	Gypsy_Tekay	NA
A11_88372733	Gypsy_Tekay	NA	A10_70761180	Gypsy_Tekay	NA
A11_93243035	Gypsy_Tekay	NA	A10_70771934	Gypsy_Tekay	NA
A12_23115275	Gypsy_Tekay	NA	A10_7426123	Gypsy_Athila	NA
A12_24755341	Gypsy_Tekay	NA	A10_7923005	Gypsy_Tekay	NA
A12_25689367	Gypsy_Tekay	NA	A10_81214908	Gypsy_Athila	NA
A12_26275419	Gypsy_Tekay	NA	A10_82094622	Copia_Ivana	NA
A12_26823217	Gypsy_Tekay	NA	A10_82131437	Gypsy_Tekay	NA
A12_26981443	Gypsy_Tekay	NA	A10_8265885	Gypsy_Tekay	NA
A12_28047595	Gypsy_Tekay	NA	A10_85999995	Gypsy_Tekay	NA
A12_28605677	Gypsy_Tekay	NA	A10_87756446	Gypsy_Tekay	NA
A12_28738052	Gypsy_Tekay	NA	A10_88575796	Gypsy_Tekay	NA
A12_29470306	Gypsy_Tekay	NA	A10_9212937	Gypsy_Tekay	NA
A12_29569312	Gypsy_Tekay	NA	A10_9328461	Gypsy_Tekay	NA
A12_36179115	Gypsy_Tekay	NA	A11_109998267	Copia_Tork	Gh_A11G316100
A12_36269735	Gypsy_Tekay	NA	A11_112080272	Copia_Tork	Gh_A11G325200
A12_38534328	Gypsy_Tekay	NA	A11_112354897	Copia_Ivana	NA
A12_40582761	Gypsy_Tekay	NA	A11_113789561	Copia_Ivana	NA
A12_40843586	Gypsy_Tekay	NA	A11_62014848	Gypsy_CRM	NA
A12_44585567	Gypsy_Tekay	NA	A11_62581851	Gypsy_Tekay	NA
A12_45018041	Gypsy_Tekay	NA	A11_93243035	Gypsy_Tekay	NA
A12_45094096	Gypsy_Tekay	NA	A12_102438041	Gypsy_Tekay	Gh_A12G266000
A12_49610168	Gypsy_Tekay	NA	A12_23115275	Gypsy_Tekay	NA
A12_51936469	Gypsy_Tekay	NA	A12_24337015	Gypsy_Tekay	NA
A12_52253700	Gypsy_Tekay	NA	A12_24753317	Gypsy_Tekay	NA
A12_54528853	Gypsy_Tekay	NA	A12_24755341	Gypsy_Tekay	NA
A12_54693933	Gypsy_Tekay	NA	A12_26003309	Gypsy_Tekay	NA
A12_54712952	Gypsy_Tekay	NA	A12_26142802	Gypsy_Tekay	NA
A12_56165702	Gypsy_Tekay	NA	A12_26275419	Gypsy_Tekay	NA
A12_57366851	Gypsy_Tekay	NA	A12_26388676	Gypsy_Tekay	NA
A12_59151499	Gypsy_Tekay	NA	A12_26823217	Gypsy_Tekay	NA
A12_60460724	Gypsy_Tekay	NA	A12_26981443	Gypsy_Tekay	NA
A12_60675548	Gypsy_Tekay	NA	A12_27086918	Gypsy_Tekay	NA
A12_60869544	Gypsy_Tekay	NA	A12_27746713	Gypsy_Tekay	NA
A12_61937777	Gypsy_Tekay	NA	A12_27942873	Gypsy_Tekay	NA
A12_65205531	Gypsy_Tekay	NA	A12_28047595	Gypsy_Tekay	NA
A12_68164511	Gypsy_Tekay	NA	A12_28605677	Gypsy_Tekay	NA
A12_68776672	Gypsy_Tekay	NA	A12_28977496	Gypsy_Tekay	Gh_A12G082900
A12_70434454	Gypsy_Tekay	NA	A12_29569312	Gypsy_Tekay	NA
A12_70462342	Gypsy_Tekay	NA	A12_31125048	Gypsy_Tekay	NA
A12_71568219	Gypsy_Tekay	NA	A12_31899245	Gypsy_Tekay	NA
A12_80847007	Copia_Tork	NA	A12_36179115	Gypsy_Tekay	NA
A13_107139432	Gypsy_Tekay	NA	A12_37344535	Gypsy_Tekay	NA
A13_1191436	Copia_Tork	NA	A12_42360829	Copia_Ivana	NA
D01_12982030	Copia_Ivana	Gh_D01G095100	A12_43580772	Gypsy_Tekay	NA
D01_13207562	Copia_Tork	NA	A12_54528853	Gypsy_Tekay	NA
D01_16271561	Copia_Tork	Gh_D01G110000	A12_54693933	Gypsy_Tekay	NA
D01_16567848	Copia_Ale	Gh_D01G111600	A12_54712952	Gypsy_Tekay	NA
D01_5415919	Copia_Tork	NA	A12_70462342	Gypsy_Tekay	NA
D01_64013446	Copia_Ivana	Gh_D01G246200	A12_80847007	Copia_Tork	NA
D01_64025141	Copia_Ivana	Gh_D01G246300	A13_106105259	Copia_Tork	NA
D01_64407135	Copia_Tork	Gh_D01G250400	A13_108267190	Gypsy_Ogre	Gh_A13G258600
D02_22532948	Gypsy_Tekay	NA	A13_84607660	Gypsy_Tekay	NA
D02_51289563	Gypsy_Tekay	NA	D01_48632328	unknown_CRM	NA
D02_60453121	Copia_Tork	Gh_D02G182000	D01_48644987	unknown_CRM	NA
D02_69759158	Gypsy_Galadriel	NA	D01_64025141	Copia_Ivana	Gh_D01G246300
D02_9010727	Copia_Ivana	NA	D02_11666540	Copia_Tork	NA
D03_13458329	Gypsy_Tekay	NA	D02_13232494	Copia_Tork	NA
D03_13835207	Gypsy_CRM	NA	D02_57975455	Gypsy_Tekay	NA
D03_1548752	Gypsy_Tekay	Gh_D03G018300	D02_8311342	unknown_CRM	NA
D03_15955985	Gypsy_Tekay	NA	D03_13051394	Gypsy_Tekay	NA
D03_16836430	Gypsy_Tekay	NA	D03_13863530	Gypsy_Tekay	NA
D03_17377765	Gypsy_Tekay	NA	D03_13974442	unknown_CRM	Gh_D03G066900
D03_17539028	Gypsy_Tekay	NA	D03_13980681	unknown_CRM	NA
D03_18347696	Gypsy_Tekay	NA	D03_14025112	unknown_CRM	NA
D03_19273599	Copia_Tork	Gh_D03G071900	D03_14854790	Gypsy_Tekay	NA
D03_23979386	Gypsy_Tekay	NA	D03_16394864	Gypsy_Tekay	NA
D03_24334483	Gypsy_Tekay	NA	D03_16948972	Gypsy_Tekay	NA
D03_25090036	Gypsy_Tekay	NA	D03_17539028	Gypsy_Tekay	NA
D03_2668153	Copia_Tork	NA	D03_17842447	Gypsy_Tekay	NA
D03_31312267	Gypsy_Tekay	NA	D03_24614675	Gypsy_Tekay	NA
D03_46673313	Copia_Tork	Gh_D03G146000	D03_26041026	Gypsy_Tekay	NA
D04_46738428	Copia_Tork	NA	D03_26912094	unknown_Tekay	NA
D04_47707378	Gypsy_Tekay	NA	D03_28795085	Gypsy_Tekay	NA
D04_53539221	Copia_Tork	Gh_D04G192100	D03_29892740	Gypsy_Tekay	NA
D05_12928533	Gypsy_Tekay	NA	D03_40383271	Gypsy_Tekay	NA
D05_14681877	Gypsy_Tekay	NA	D03_42287601	Gypsy_Tekay	NA
D05_15098904	Gypsy_Tekay	Gh_D05G173200	D03_46673313	Copia_Tork	Gh_D03G146000
D05_15789663	Gypsy_Tekay	NA	D03_51494168	Copia_Tork	NA
D05_16175788	Copia_Tork	Gh_D05G184800	D03_52628010	Copia_Tork	NA
D05_17428079	Gypsy_Tekay	NA	D03_967684	Gypsy_Tekay	NA
D05_17491562	Gypsy_Tekay	NA	D04_49411015	Copia_Tork	Gh_D04G162400
D05_20321949	Copia_Ivana	Gh_D05G227200	D04_49411015	Copia_Tork	Gh_D04G162500
D05_8530582	Copia_Tork	NA	D04_49432484	Gypsy_Galadriel	Gh_D04G162600
D05_9519337	unknown_Tekay	NA	D05_11697435	Gypsy_Tekay	NA
D06_46871305	Gypsy_Tekay	NA	D05_12006757	Copia_Tork	Gh_D05G139600
D06_47332434	Copia_Tork	NA	D05_15135387	Copia_Ale	Gh_D05G173700
D06_47348703	Copia_Ivana	Gh_D06G152200	D05_16175788	Copia_Tork	Gh_D05G184800
D06_64658174	unknown_CRM	Gh_D06G230700	D05_16344969	Copia_Ivana	Gh_D05G186200
D06_662457	unknown_CRM	NA	D05_16344969	Copia_Ivana	Gh_D05G186300
D06_7247226	Copia_Tork	NA	D05_17449260	Gypsy_Tekay	NA
D07_49349819	Gypsy_Tekay	NA	D05_18701009	Gypsy_Tekay	NA
D08_2061983	Gypsy_CRM	Gh_D08G022000	D05_20321949	Copia_Ivana	Gh_D05G227200
D08_44965748	Copia_Ivana	NA	D05_20789478	Gypsy_Tekay	NA
D08_68529327	Copia_Tork	Gh_D08G279000	D05_20804263	Copia_Ivana	Gh_D05G230500
D09_24600238	Gypsy_Tekay	NA	D05_22297951	Gypsy_Tekay	NA
D09_29236627	Copia_Tork	NA	D05_22323812	Gypsy_Tekay	Gh_D05G242100
D09_36462639	Gypsy_Tekay	Gh_D09G107600	D05_22660288	Gypsy_Tekay	NA
D09_36520438	Copia_Ale	NA	D05_22839511	Gypsy_Tekay	NA
D09_36730597	Gypsy_Tekay	NA	D05_24466603	Copia_Tork	NA
D09_41664829	Copia_Tork	Gh_D09G145800	D05_52177391	Gypsy_Tekay	Gh_D05G336900
D09_41685005	unknown_Tekay	Gh_D09G145900	D05_52279205	Gypsy_Tekay	NA
D09_42747385	Copia_Tork	Gh_D09G154600	D06_48210993	Gypsy_Tekay	NA
D09_42895808	Copia_Tork	Gh_D09G155700	D06_48249810	Gypsy_Tekay	NA
D09_50596646	Copia_Tork	Gh_D09G240000	D06_63622133	Gypsy_Tekay	Gh_D06G222600
D10_18966118	Copia_Tork	Gh_D10G122700	D07_27781285	Gypsy_Tekay	NA
D10_2385335	Copia_Ivana	Gh_D10G027300	D08_66317713	Gypsy_Tekay	NA
D10_2385335	Copia_Ivana	Gh_D10G027400	D09_11115044	Gypsy_Tekay	NA
D10_26342777	Gypsy_Tekay	NA	D09_11995844	Gypsy_Tekay	NA
D10_27256848	Gypsy_Tekay	NA	D09_12805717	Gypsy_Tekay	NA
D10_35048666	Gypsy_Tekay	NA	D09_12890830	Gypsy_Tekay	NA
D10_35908634	Gypsy_Tekay	NA	D09_12937159	Gypsy_Tekay	NA
D10_37507299	Gypsy_Tekay	NA	D09_13305659	Gypsy_Tekay	NA
D10_37639976	Gypsy_Tekay	NA	D09_13893008	Gypsy_Tekay	NA
D10_38991831	unknown_CRM	NA	D09_14219122	Gypsy_Tekay	NA
D10_4019085	Copia_Tork	NA	D09_14289114	Gypsy_Tekay	NA
D10_41785990	Gypsy_Tekay	NA	D09_19097109	unknown_CRM	NA
D10_42059801	Gypsy_Tekay	NA	D09_21130389	Gypsy_Tekay	NA
D10_4278162	Gypsy_Tekay	NA	D09_36308327	Gypsy_Tekay	NA
D10_43986434	Gypsy_Tekay	NA	D09_38244739	Gypsy_Tekay	NA
D10_44960970	Copia_Ivana	NA	D09_51852646	Gypsy_Tekay	Gh_D09G256200
D10_51469162	Gypsy_Tekay	NA	D09_7304994	Copia_Tork	Gh_D09G027800
D10_53585626	Gypsy_Tekay	NA	D10_12676073	Copia_Tork	NA
D10_60645504	Copia_Ivana	NA	D10_19560537	unknown_CRM	NA
D11_1599607	Gypsy_Tekay	Gh_D11G018100	D10_29464171	Gypsy_Tekay	NA
D11_18896394	Gypsy_Tekay	Gh_D11G179100	D10_29734063	Copia_Ivana	NA
D11_1973821	Copia_Tork	NA	D10_35048666	Gypsy_Tekay	NA
D11_23082497	Copia_Tork	NA	D10_35908634	Gypsy_Tekay	NA
D11_31690583	Copia_Ivana	Gh_D11G228900	D10_37507299	Gypsy_Tekay	NA
D11_32576478	Gypsy_Tekay	NA	D10_37639976	Gypsy_Tekay	NA
D11_3817944	Copia_Tork	Gh_D11G047200	D10_37928143	Gypsy_Tekay	NA
D11_41514654	Gypsy_CRM	NA	D10_40965506	Gypsy_Tekay	NA
D11_4246848	Copia_Tork	Gh_D11G051600	D11_18896394	Gypsy_Tekay	Gh_D11G179100
D11_51716263	Gypsy_Tekay	NA	D11_20244717	Gypsy_Tekay	NA
D11_66829251	Copia_Tork	Gh_D11G336900	D11_66829251	Copia_Tork	Gh_D11G336900
D11_7298757	Copia_Tork	NA	D12_19412736	unknown_CRM	NA
D11_8702785	Copia_Tork	NA	D12_19500117	Gypsy_CRM	NA
D12_22569923	Gypsy_Tekay	NA	D12_2138457	Copia_Tork	NA
D12_23791238	Copia_Tork	NA	D12_26047111	Gypsy_Tekay	NA
D12_2785873	Copia_Tork	NA	D12_26534519	Gypsy_Tekay	NA
D12_30384460	Gypsy_Tekay	NA	D12_29586936	Gypsy_Tekay	NA
D12_37601060	Gypsy_Tekay	NA	D12_301433	Copia_Tork	NA
D12_4674473	Copia_Tork	Gh_D12G034500	D12_33039048	Gypsy_Tekay	NA
D12_61319843	Copia_Tork	Gh_D12G281500	D12_45780441	Gypsy_Tekay	NA
D13_2802189	Copia_Tork	NA	D12_4674473	Copia_Tork	Gh_D12G034500
D13_49665426	Copia_Tork	Gh_D13G161300	D12_53774151	Gypsy_Tekay	Gh_D12G205000
D13_52124737	Copia_Tork	NA	D12_54427619	Gypsy_Tekay	NA
D13_58269318	Copia_Tork	NA	D13_1622875	Copia_Tork	NA
D13_58952487	Gypsy_Tekay	NA	D13_3902540	Copia_Ivana	NA
			D13_52697041	Copia_Tork	Gh_D13G175400
			D13_63658839	Copia_Tork	Gh_D13G264300

## Sheet: Stable5b
TableS5b. TIPs with high PBS, associated TE lineages and genes nearby in G. barbadense
High PBS in Cultivated vs wild/landrace			High PBS in wild vs cultivated/landraces
TIP	family	gene	TIP	family	gene
Gbar_A01_6408504	LTR-RT/Copia_Ale	Gbar_A01G004610	Gbar_A01_105537349	LTR-RT/Copia_Ale	Gbar_A01G017200
Gbar_D03_45917013	LTR-RT/Copia_Ale	Gbar_D03G014450	Gbar_A01_49920052	LTR-RT/Copia_Ale	Gbar_A01G013030
Gbar_D05_86948	LTR-RT/Copia_Ale	Gbar_D05G000030	Gbar_A01_104697736	LTR-RT/Copia_Ivana	Gbar_A01G016930
Gbar_A05_13490438	LTR-RT/Copia_Ale	NA	Gbar_A01_104697736	LTR-RT/Copia_Ivana	Gbar_A01G016940
Gbar_D02_66007724	LTR-RT/Copia_Ale	NA	Gbar_A08_89417445	LTR-RT/Copia_Ivana	Gbar_A08G013600
Gbar_A08_84219835	LTR-RT/Copia_Ivana	Gbar_A08G012570	Gbar_A13_102310179	LTR-RT/Copia_Ivana	Gbar_A13G019070
Gbar_A08_89417445	LTR-RT/Copia_Ivana	Gbar_A08G013600	Gbar_D02_44227053	LTR-RT/Copia_Ivana	Gbar_D02G014250
Gbar_A10_109191850	LTR-RT/Copia_Ivana	Gbar_A10G024970	Gbar_D06_39678713	LTR-RT/Copia_Ivana	Gbar_D06G013690
Gbar_A10_4599908	LTR-RT/Copia_Ivana	Gbar_A10G005110	Gbar_D11_55138013	LTR-RT/Copia_Ivana	Gbar_D11G027380
Gbar_A11_105046867	LTR-RT/Copia_Ivana	Gbar_A11G030650	Gbar_A01_105973902	LTR-RT/Copia_Ivana	NA
Gbar_D06_39678713	LTR-RT/Copia_Ivana	Gbar_D06G013690	Gbar_A01_109063267	LTR-RT/Copia_Ivana	NA
Gbar_D11_55138013	LTR-RT/Copia_Ivana	Gbar_D11G027380	Gbar_A01_79902844	LTR-RT/Copia_Ivana	NA
Gbar_D11_63182142	LTR-RT/Copia_Ivana	Gbar_D11G031990	Gbar_A04_80742209	LTR-RT/Copia_Ivana	NA
Gbar_A01_105973902	LTR-RT/Copia_Ivana	NA	Gbar_D05_56771601	LTR-RT/Copia_Ivana	NA
Gbar_A01_106305842	LTR-RT/Copia_Ivana	NA	Gbar_D06_8201796	LTR-RT/Copia_Ivana	NA
Gbar_A01_79902844	LTR-RT/Copia_Ivana	NA	Gbar_D12_766925	LTR-RT/Copia_Ivana	NA
Gbar_A08_111680362	LTR-RT/Copia_Ivana	NA	Gbar_A01_104695392	LTR-RT/Copia_TAR	Gbar_A01G016930
Gbar_A11_99331241	LTR-RT/Copia_Ivana	NA	Gbar_A01_104695392	LTR-RT/Copia_TAR	Gbar_A01G016940
Gbar_D12_766925	LTR-RT/Copia_Ivana	NA	Gbar_A01_104543841	LTR-RT/Copia_Tork	Gbar_A01G016850
Gbar_D13_2034155	LTR-RT/Copia_TAR	Gbar_D13G002300	Gbar_A01_104543841	LTR-RT/Copia_Tork	Gbar_A01G016860
Gbar_A01_5679683	LTR-RT/Copia_Tork	Gbar_A01G004340	Gbar_A01_109744489	LTR-RT/Copia_Tork	Gbar_A01G018960
Gbar_A02_531819	LTR-RT/Copia_Tork	Gbar_A02G000740	Gbar_A01_109744489	LTR-RT/Copia_Tork	Gbar_A01G018970
Gbar_A03_101965085	LTR-RT/Copia_Tork	Gbar_A03G019910	Gbar_A01_50552002	LTR-RT/Copia_Tork	Gbar_A01G013060
Gbar_A05_12910004	LTR-RT/Copia_Tork	Gbar_A05G014000	Gbar_A02_1062364	LTR-RT/Copia_Tork	Gbar_A02G001130
Gbar_A05_12910004	LTR-RT/Copia_Tork	Gbar_A05G014010	Gbar_A08_86106427	LTR-RT/Copia_Tork	Gbar_A08G012850
Gbar_A05_13286768	LTR-RT/Copia_Tork	Gbar_A05G014380	Gbar_D03_9981392	LTR-RT/Copia_Tork	Gbar_D03G005480
Gbar_A05_13627156	LTR-RT/Copia_Tork	Gbar_A05G014720	Gbar_D09_50959911	LTR-RT/Copia_Tork	Gbar_D09G025550
Gbar_A05_14409541	LTR-RT/Copia_Tork	Gbar_A05G015450	Gbar_A01_102499507	LTR-RT/Copia_Tork	NA
Gbar_A05_14561934	LTR-RT/Copia_Tork	Gbar_A05G015650	Gbar_A01_109283370	LTR-RT/Copia_Tork	NA
Gbar_A05_15010653	LTR-RT/Copia_Tork	Gbar_A05G016070	Gbar_A01_46174611	LTR-RT/Copia_Tork	NA
Gbar_A06_30644749	LTR-RT/Copia_Tork	Gbar_A06G009630	Gbar_A01_85657526	LTR-RT/Copia_Tork	NA
Gbar_A07_12135951	LTR-RT/Copia_Tork	Gbar_A07G008590	Gbar_A08_87493131	LTR-RT/Copia_Tork	NA
Gbar_A07_25679904	LTR-RT/Copia_Tork	Gbar_A07G013230	Gbar_A08_88057001	LTR-RT/Copia_Tork	NA
Gbar_A10_109770599	LTR-RT/Copia_Tork	Gbar_A10G025500	Gbar_D11_55125763	LTR-RT/Copia_Tork	NA
Gbar_A10_110125299	LTR-RT/Copia_Tork	Gbar_A10G025810	Gbar_D11_60368599	LTR-RT/Copia_Tork	NA
Gbar_A10_2725171	LTR-RT/Copia_Tork	Gbar_A10G003240	Gbar_A01_45147640	LTR-RT/Gypsy_Galadriel	NA
Gbar_A11_112129487	LTR-RT/Copia_Tork	Gbar_A11G034000	Gbar_A01_73024371	LTR-RT/Gypsy_Reina34	NA
Gbar_D01_61698643	LTR-RT/Copia_Tork	Gbar_D01G022650	Gbar_A01_110048995	LTR-RT/Gypsy_Reina96	Gbar_A01G019130
Gbar_D01_61698643	LTR-RT/Copia_Tork	Gbar_D01G022660	Gbar_A01_102087574	LTR-RT/Gypsy_Tekay	NA
Gbar_D02_64711752	LTR-RT/Copia_Tork	Gbar_D02G021970	Gbar_A01_104344812	LTR-RT/Gypsy_Tekay	NA
Gbar_D03_12776925	LTR-RT/Copia_Tork	Gbar_D03G006050	Gbar_A01_105863577	LTR-RT/Gypsy_Tekay	NA
Gbar_D03_3786631	LTR-RT/Copia_Tork	Gbar_D03G003440	Gbar_A01_108379882	LTR-RT/Gypsy_Tekay	NA
Gbar_D04_13365837	LTR-RT/Copia_Tork	Gbar_D04G007520	Gbar_A01_109342979	LTR-RT/Gypsy_Tekay	NA
Gbar_D04_13365837	LTR-RT/Copia_Tork	Gbar_D04G007530	Gbar_A01_109446561	LTR-RT/Gypsy_Tekay	NA
Gbar_D05_13744633	LTR-RT/Copia_Tork	Gbar_D05G015980	Gbar_A01_109787852	LTR-RT/Gypsy_Tekay	NA
Gbar_D06_19539828	LTR-RT/Copia_Tork	Gbar_D06G010120	Gbar_A01_110372084	LTR-RT/Gypsy_Tekay	NA
Gbar_D09_34806529	LTR-RT/Copia_Tork	Gbar_D09G010060	Gbar_A01_42205770	LTR-RT/Gypsy_Tekay	NA
Gbar_D09_44735491	LTR-RT/Copia_Tork	Gbar_D09G018290	Gbar_A01_43014202	LTR-RT/Gypsy_Tekay	NA
Gbar_D09_44735491	LTR-RT/Copia_Tork	Gbar_D09G018300	Gbar_A01_43430844	LTR-RT/Gypsy_Tekay	NA
Gbar_D10_1486615	LTR-RT/Copia_Tork	Gbar_D10G001910	Gbar_A01_45481011	LTR-RT/Gypsy_Tekay	NA
Gbar_D11_2065529	LTR-RT/Copia_Tork	Gbar_D11G002630	Gbar_A01_46256757	LTR-RT/Gypsy_Tekay	NA
Gbar_D11_55028165	LTR-RT/Copia_Tork	Gbar_D11G027330	Gbar_A01_46357635	LTR-RT/Gypsy_Tekay	NA
Gbar_D12_21974305	LTR-RT/Copia_Tork	Gbar_D12G008670	Gbar_A01_47593713	LTR-RT/Gypsy_Tekay	NA
Gbar_D12_54344045	LTR-RT/Copia_Tork	Gbar_D12G023440	Gbar_A01_47886866	LTR-RT/Gypsy_Tekay	NA
Gbar_D12_54344045	LTR-RT/Copia_Tork	Gbar_D12G023450	Gbar_A01_48935373	LTR-RT/Gypsy_Tekay	NA
Gbar_D13_58420169	LTR-RT/Copia_Tork	Gbar_D13G023590	Gbar_A01_49930562	LTR-RT/Gypsy_Tekay	NA
Gbar_D13_59752979	LTR-RT/Copia_Tork	Gbar_D13G024940	Gbar_A01_50146351	LTR-RT/Gypsy_Tekay	NA
Gbar_A01_102499507	LTR-RT/Copia_Tork	NA	Gbar_A01_50393822	LTR-RT/Gypsy_Tekay	NA
Gbar_A01_109283370	LTR-RT/Copia_Tork	NA	Gbar_A01_50396383	LTR-RT/Gypsy_Tekay	NA
Gbar_A01_6314265	LTR-RT/Copia_Tork	NA	Gbar_A01_54771863	LTR-RT/Gypsy_Tekay	NA
Gbar_A02_1700621	LTR-RT/Copia_Tork	NA	Gbar_A01_55812529	LTR-RT/Gypsy_Tekay	NA
Gbar_A02_2319006	LTR-RT/Copia_Tork	NA	Gbar_A01_59238284	LTR-RT/Gypsy_Tekay	NA
Gbar_A04_79977165	LTR-RT/Copia_Tork	NA	Gbar_A01_59254736	LTR-RT/Gypsy_Tekay	NA
Gbar_A05_15132021	LTR-RT/Copia_Tork	NA	Gbar_A01_59355186	LTR-RT/Gypsy_Tekay	NA
Gbar_A07_6175284	LTR-RT/Copia_Tork	NA	Gbar_A01_59583965	LTR-RT/Gypsy_Tekay	NA
Gbar_A07_7884394	LTR-RT/Copia_Tork	NA	Gbar_A01_62443490	LTR-RT/Gypsy_Tekay	NA
Gbar_A10_108681640	LTR-RT/Copia_Tork	NA	Gbar_A01_62817809	LTR-RT/Gypsy_Tekay	NA
Gbar_D03_30966004	LTR-RT/Copia_Tork	NA	Gbar_A01_67121531	LTR-RT/Gypsy_Tekay	NA
Gbar_D04_12271976	LTR-RT/Copia_Tork	NA	Gbar_A01_72813857	LTR-RT/Gypsy_Tekay	NA
Gbar_D05_16852380	LTR-RT/Copia_Tork	NA	Gbar_A01_73963802	LTR-RT/Gypsy_Tekay	NA
Gbar_D05_60768606	LTR-RT/Copia_Tork	NA	Gbar_A01_76524701	LTR-RT/Gypsy_Tekay	NA
Gbar_D08_37103633	LTR-RT/Copia_Tork	NA	Gbar_A01_76572185	LTR-RT/Gypsy_Tekay	NA
Gbar_D11_55125763	LTR-RT/Copia_Tork	NA	Gbar_A01_77787632	LTR-RT/Gypsy_Tekay	NA
Gbar_A03_39038684	LTR-RT/Gypsy_CRM	NA	Gbar_A01_78887361	LTR-RT/Gypsy_Tekay	NA
Gbar_A06_2038462	LTR-RT/Gypsy_Galadriel	Gbar_A06G001910	Gbar_A01_79171680	LTR-RT/Gypsy_Tekay	NA
Gbar_A01_110048995	LTR-RT/Gypsy_Reina96	Gbar_A01G019130	Gbar_A01_79413209	LTR-RT/Gypsy_Tekay	NA
Gbar_A01_109933761	LTR-RT/Gypsy_Tekay	Gbar_A01G019060	Gbar_A01_80617352	LTR-RT/Gypsy_Tekay	NA
Gbar_D07_30359355	LTR-RT/Gypsy_Tekay	Gbar_D07G017300	Gbar_A01_81602723	LTR-RT/Gypsy_Tekay	NA
Gbar_D08_19140422	LTR-RT/Gypsy_Tekay	Gbar_D08G009540	Gbar_A01_84088619	LTR-RT/Gypsy_Tekay	NA
Gbar_A01_102087574	LTR-RT/Gypsy_Tekay	NA	Gbar_A01_87036570	LTR-RT/Gypsy_Tekay	NA
Gbar_A01_104344812	LTR-RT/Gypsy_Tekay	NA	Gbar_A01_88556158	LTR-RT/Gypsy_Tekay	NA
Gbar_A01_105863577	LTR-RT/Gypsy_Tekay	NA	Gbar_A01_88709082	LTR-RT/Gypsy_Tekay	NA
Gbar_A01_108379882	LTR-RT/Gypsy_Tekay	NA	Gbar_A01_88946693	LTR-RT/Gypsy_Tekay	NA
Gbar_A01_109342979	LTR-RT/Gypsy_Tekay	NA	Gbar_A01_88969123	LTR-RT/Gypsy_Tekay	NA
Gbar_A01_109787852	LTR-RT/Gypsy_Tekay	NA	Gbar_A01_89294348	LTR-RT/Gypsy_Tekay	NA
Gbar_A01_110372084	LTR-RT/Gypsy_Tekay	NA	Gbar_A01_89600294	LTR-RT/Gypsy_Tekay	NA
Gbar_A01_42205770	LTR-RT/Gypsy_Tekay	NA	Gbar_A01_89873891	LTR-RT/Gypsy_Tekay	NA
Gbar_A01_43014202	LTR-RT/Gypsy_Tekay	NA	Gbar_A06_35421852	LTR-RT/Gypsy_Tekay	NA
Gbar_A01_45481011	LTR-RT/Gypsy_Tekay	NA	Gbar_A07_68712541	LTR-RT/Gypsy_Tekay	NA
Gbar_A01_46357635	LTR-RT/Gypsy_Tekay	NA	Gbar_A08_104636976	LTR-RT/Gypsy_Tekay	NA
Gbar_A01_47593713	LTR-RT/Gypsy_Tekay	NA	Gbar_A08_89247794	LTR-RT/Gypsy_Tekay	NA
Gbar_A01_48935373	LTR-RT/Gypsy_Tekay	NA	Gbar_A08_89401340	LTR-RT/Gypsy_Tekay	NA
Gbar_A01_50146351	LTR-RT/Gypsy_Tekay	NA	Gbar_A08_91843936	LTR-RT/Gypsy_Tekay	NA
Gbar_A01_50396383	LTR-RT/Gypsy_Tekay	NA	Gbar_A08_92179983	LTR-RT/Gypsy_Tekay	NA
Gbar_A01_60549156	LTR-RT/Gypsy_Tekay	NA	Gbar_A12_49004074	LTR-RT/Gypsy_Tekay	NA
Gbar_A01_67121531	LTR-RT/Gypsy_Tekay	NA	Gbar_A12_62117251	LTR-RT/Gypsy_Tekay	NA
Gbar_A01_67218416	LTR-RT/Gypsy_Tekay	NA	Gbar_A12_69488163	LTR-RT/Gypsy_Tekay	NA
Gbar_A01_79413209	LTR-RT/Gypsy_Tekay	NA	Gbar_D07_32986406	LTR-RT/Gypsy_Tekay	NA
Gbar_A01_81602723	LTR-RT/Gypsy_Tekay	NA	Gbar_D13_16277372	LTR-RT/Gypsy_Tekay	NA
Gbar_A01_84088619	LTR-RT/Gypsy_Tekay	NA	Gbar_A01_102979952	LTR-RT/unknown_Ivana	Gbar_A01G016440
Gbar_A01_87036570	LTR-RT/Gypsy_Tekay	NA	Gbar_A01_109744489	soloLTR/Copia_Tork	Gbar_A01G018960
Gbar_A01_88709082	LTR-RT/Gypsy_Tekay	NA	Gbar_A01_109744489	soloLTR/Copia_Tork	Gbar_A01G018970
Gbar_A01_88946693	LTR-RT/Gypsy_Tekay	NA	Gbar_A11_110281934	soloLTR/Copia_Tork	NA
Gbar_A01_88969123	LTR-RT/Gypsy_Tekay	NA	Gbar_A01_69952850	soloLTR/Gypsy_CRM	Gbar_A01G013900
Gbar_A01_89294348	LTR-RT/Gypsy_Tekay	NA	Gbar_A01_65176291	soloLTR/Gypsy_CRM	NA
Gbar_A01_89600294	LTR-RT/Gypsy_Tekay	NA	Gbar_A08_92271757	soloLTR/Gypsy_Tekay	Gbar_A08G013670
Gbar_A01_89873891	LTR-RT/Gypsy_Tekay	NA	Gbar_D12_711124	soloLTR/Gypsy_Tekay	Gbar_D12G000550
Gbar_A01_92385603	LTR-RT/Gypsy_Tekay	NA	Gbar_A01_103333745	soloLTR/Gypsy_Tekay	NA
Gbar_A02_83184116	LTR-RT/Gypsy_Tekay	NA	Gbar_A01_103853280	soloLTR/Gypsy_Tekay	NA
Gbar_A03_39560290	LTR-RT/Gypsy_Tekay	NA	Gbar_A01_104453772	soloLTR/Gypsy_Tekay	NA
Gbar_A04_25075501	LTR-RT/Gypsy_Tekay	NA	Gbar_A01_106504976	soloLTR/Gypsy_Tekay	NA
Gbar_A06_31031684	LTR-RT/Gypsy_Tekay	NA	Gbar_A01_109033213	soloLTR/Gypsy_Tekay	NA
Gbar_A06_35421852	LTR-RT/Gypsy_Tekay	NA	Gbar_A01_109546949	soloLTR/Gypsy_Tekay	NA
Gbar_A06_36871543	LTR-RT/Gypsy_Tekay	NA	Gbar_A01_41538218	soloLTR/Gypsy_Tekay	NA
Gbar_A07_68712541	LTR-RT/Gypsy_Tekay	NA	Gbar_A01_41911122	soloLTR/Gypsy_Tekay	NA
Gbar_A08_104636976	LTR-RT/Gypsy_Tekay	NA	Gbar_A01_42398254	soloLTR/Gypsy_Tekay	NA
Gbar_A08_87297100	LTR-RT/Gypsy_Tekay	NA	Gbar_A01_42943527	soloLTR/Gypsy_Tekay	NA
Gbar_A08_89247794	LTR-RT/Gypsy_Tekay	NA	Gbar_A01_43043278	soloLTR/Gypsy_Tekay	NA
Gbar_A08_89401340	LTR-RT/Gypsy_Tekay	NA	Gbar_A01_43088227	soloLTR/Gypsy_Tekay	NA
Gbar_A08_92179983	LTR-RT/Gypsy_Tekay	NA	Gbar_A01_45152314	soloLTR/Gypsy_Tekay	NA
Gbar_A11_63697754	LTR-RT/Gypsy_Tekay	NA	Gbar_A01_46815806	soloLTR/Gypsy_Tekay	NA
Gbar_A12_49004074	LTR-RT/Gypsy_Tekay	NA	Gbar_A01_47176859	soloLTR/Gypsy_Tekay	NA
Gbar_A12_62117251	LTR-RT/Gypsy_Tekay	NA	Gbar_A01_47925319	soloLTR/Gypsy_Tekay	NA
Gbar_D07_32986406	LTR-RT/Gypsy_Tekay	NA	Gbar_A01_49954878	soloLTR/Gypsy_Tekay	NA
Gbar_D07_34859885	LTR-RT/Gypsy_Tekay	NA	Gbar_A01_50074843	soloLTR/Gypsy_Tekay	NA
Gbar_D11_50014601	LTR-RT/Gypsy_Tekay	NA	Gbar_A01_50186705	soloLTR/Gypsy_Tekay	NA
Gbar_D11_50123729	LTR-RT/Gypsy_Tekay	NA	Gbar_A01_50305566	soloLTR/Gypsy_Tekay	NA
Gbar_D11_54864167	LTR-RT/Gypsy_Tekay	NA	Gbar_A01_50332877	soloLTR/Gypsy_Tekay	NA
Gbar_D12_24967925	LTR-RT/Gypsy_Tekay	NA	Gbar_A01_51739567	soloLTR/Gypsy_Tekay	NA
Gbar_A01_102979952	LTR-RT/unknown_Ivana	Gbar_A01G016440	Gbar_A01_52151773	soloLTR/Gypsy_Tekay	NA
Gbar_A05_10164789	soloLTR/Copia_Ale	Gbar_A05G011060	Gbar_A01_52870761	soloLTR/Gypsy_Tekay	NA
Gbar_A05_13098411	soloLTR/Copia_Ivana	Gbar_A05G014230	Gbar_A01_52985286	soloLTR/Gypsy_Tekay	NA
Gbar_D11_55863999	soloLTR/Copia_Ivana	Gbar_D11G027650	Gbar_A01_54447360	soloLTR/Gypsy_Tekay	NA
Gbar_A11_112319954	soloLTR/Copia_Tork	NA	Gbar_A01_55870337	soloLTR/Gypsy_Tekay	NA
Gbar_A01_50699575	soloLTR/Gypsy_CRM	NA	Gbar_A01_56932069	soloLTR/Gypsy_Tekay	NA
Gbar_D11_55388767	soloLTR/Gypsy_CRM	NA	Gbar_A01_57120721	soloLTR/Gypsy_Tekay	NA
Gbar_A08_92271757	soloLTR/Gypsy_Tekay	Gbar_A08G013670	Gbar_A01_57856475	soloLTR/Gypsy_Tekay	NA
Gbar_A10_2550714	soloLTR/Gypsy_Tekay	Gbar_A10G003050	Gbar_A01_58070741	soloLTR/Gypsy_Tekay	NA
Gbar_D07_234628	soloLTR/Gypsy_Tekay	Gbar_D07G000250	Gbar_A01_58084742	soloLTR/Gypsy_Tekay	NA
Gbar_D11_56790601	soloLTR/Gypsy_Tekay	Gbar_D11G028130	Gbar_A01_59053763	soloLTR/Gypsy_Tekay	NA
Gbar_A01_103333745	soloLTR/Gypsy_Tekay	NA	Gbar_A01_59207400	soloLTR/Gypsy_Tekay	NA
Gbar_A01_103853280	soloLTR/Gypsy_Tekay	NA	Gbar_A01_59547942	soloLTR/Gypsy_Tekay	NA
Gbar_A01_104453772	soloLTR/Gypsy_Tekay	NA	Gbar_A01_59926793	soloLTR/Gypsy_Tekay	NA
Gbar_A01_106504976	soloLTR/Gypsy_Tekay	NA	Gbar_A01_61189381	soloLTR/Gypsy_Tekay	NA
Gbar_A01_109546949	soloLTR/Gypsy_Tekay	NA	Gbar_A01_61263009	soloLTR/Gypsy_Tekay	NA
Gbar_A01_111230837	soloLTR/Gypsy_Tekay	NA	Gbar_A01_61826170	soloLTR/Gypsy_Tekay	NA
Gbar_A01_41538218	soloLTR/Gypsy_Tekay	NA	Gbar_A01_61903602	soloLTR/Gypsy_Tekay	NA
Gbar_A01_41911122	soloLTR/Gypsy_Tekay	NA	Gbar_A01_67693796	soloLTR/Gypsy_Tekay	NA
Gbar_A01_42943527	soloLTR/Gypsy_Tekay	NA	Gbar_A01_67792310	soloLTR/Gypsy_Tekay	NA
Gbar_A01_43088227	soloLTR/Gypsy_Tekay	NA	Gbar_A01_67966206	soloLTR/Gypsy_Tekay	NA
Gbar_A01_45152314	soloLTR/Gypsy_Tekay	NA	Gbar_A01_68508889	soloLTR/Gypsy_Tekay	NA
Gbar_A01_46815806	soloLTR/Gypsy_Tekay	NA	Gbar_A01_69897702	soloLTR/Gypsy_Tekay	NA
Gbar_A01_50074843	soloLTR/Gypsy_Tekay	NA	Gbar_A01_69998774	soloLTR/Gypsy_Tekay	NA
Gbar_A01_50186705	soloLTR/Gypsy_Tekay	NA	Gbar_A01_71058049	soloLTR/Gypsy_Tekay	NA
Gbar_A01_52151773	soloLTR/Gypsy_Tekay	NA	Gbar_A01_72328923	soloLTR/Gypsy_Tekay	NA
Gbar_A01_54243483	soloLTR/Gypsy_Tekay	NA	Gbar_A01_73284615	soloLTR/Gypsy_Tekay	NA
Gbar_A01_58070741	soloLTR/Gypsy_Tekay	NA	Gbar_A01_73465345	soloLTR/Gypsy_Tekay	NA
Gbar_A01_62465156	soloLTR/Gypsy_Tekay	NA	Gbar_A01_74863771	soloLTR/Gypsy_Tekay	NA
Gbar_A01_67094225	soloLTR/Gypsy_Tekay	NA	Gbar_A01_75328767	soloLTR/Gypsy_Tekay	NA
Gbar_A01_79694602	soloLTR/Gypsy_Tekay	NA	Gbar_A01_75698951	soloLTR/Gypsy_Tekay	NA
Gbar_A01_79706941	soloLTR/Gypsy_Tekay	NA	Gbar_A01_75725802	soloLTR/Gypsy_Tekay	NA
Gbar_A01_79798054	soloLTR/Gypsy_Tekay	NA	Gbar_A01_77793153	soloLTR/Gypsy_Tekay	NA
Gbar_A01_80227863	soloLTR/Gypsy_Tekay	NA	Gbar_A01_77795269	soloLTR/Gypsy_Tekay	NA
Gbar_A01_81457841	soloLTR/Gypsy_Tekay	NA	Gbar_A01_78917221	soloLTR/Gypsy_Tekay	NA
Gbar_A01_81802824	soloLTR/Gypsy_Tekay	NA	Gbar_A01_79694602	soloLTR/Gypsy_Tekay	NA
Gbar_A01_82137593	soloLTR/Gypsy_Tekay	NA	Gbar_A01_79706941	soloLTR/Gypsy_Tekay	NA
Gbar_A01_83652796	soloLTR/Gypsy_Tekay	NA	Gbar_A01_79798054	soloLTR/Gypsy_Tekay	NA
Gbar_A01_84793718	soloLTR/Gypsy_Tekay	NA	Gbar_A01_80227863	soloLTR/Gypsy_Tekay	NA
Gbar_A01_85683630	soloLTR/Gypsy_Tekay	NA	Gbar_A01_80860028	soloLTR/Gypsy_Tekay	NA
Gbar_A01_86677043	soloLTR/Gypsy_Tekay	NA	Gbar_A01_80877731	soloLTR/Gypsy_Tekay	NA
Gbar_A01_86708853	soloLTR/Gypsy_Tekay	NA	Gbar_A01_80899872	soloLTR/Gypsy_Tekay	NA
Gbar_A01_87165307	soloLTR/Gypsy_Tekay	NA	Gbar_A01_81094086	soloLTR/Gypsy_Tekay	NA
Gbar_A01_87701821	soloLTR/Gypsy_Tekay	NA	Gbar_A01_81457841	soloLTR/Gypsy_Tekay	NA
Gbar_A01_87738941	soloLTR/Gypsy_Tekay	NA	Gbar_A01_81802824	soloLTR/Gypsy_Tekay	NA
Gbar_A01_88930873	soloLTR/Gypsy_Tekay	NA	Gbar_A01_82137593	soloLTR/Gypsy_Tekay	NA
Gbar_A01_89830051	soloLTR/Gypsy_Tekay	NA	Gbar_A01_82740966	soloLTR/Gypsy_Tekay	NA
Gbar_A02_36349861	soloLTR/Gypsy_Tekay	NA	Gbar_A01_83652796	soloLTR/Gypsy_Tekay	NA
Gbar_A02_63859429	soloLTR/Gypsy_Tekay	NA	Gbar_A01_84793718	soloLTR/Gypsy_Tekay	NA
Gbar_A03_18230904	soloLTR/Gypsy_Tekay	NA	Gbar_A01_84802729	soloLTR/Gypsy_Tekay	NA
Gbar_A03_46019703	soloLTR/Gypsy_Tekay	NA	Gbar_A01_85683630	soloLTR/Gypsy_Tekay	NA
Gbar_A03_6284541	soloLTR/Gypsy_Tekay	NA	Gbar_A01_86677043	soloLTR/Gypsy_Tekay	NA
Gbar_A03_76333926	soloLTR/Gypsy_Tekay	NA	Gbar_A01_86708853	soloLTR/Gypsy_Tekay	NA
Gbar_A04_77513616	soloLTR/Gypsy_Tekay	NA	Gbar_A01_87165307	soloLTR/Gypsy_Tekay	NA
Gbar_A05_33789339	soloLTR/Gypsy_Tekay	NA	Gbar_A01_87677063	soloLTR/Gypsy_Tekay	NA
Gbar_A05_85657853	soloLTR/Gypsy_Tekay	NA	Gbar_A01_87701821	soloLTR/Gypsy_Tekay	NA
Gbar_A06_30450446	soloLTR/Gypsy_Tekay	NA	Gbar_A01_87738941	soloLTR/Gypsy_Tekay	NA
Gbar_A06_33661714	soloLTR/Gypsy_Tekay	NA	Gbar_A01_88930873	soloLTR/Gypsy_Tekay	NA
Gbar_A08_32657309	soloLTR/Gypsy_Tekay	NA	Gbar_A01_89107395	soloLTR/Gypsy_Tekay	NA
Gbar_A08_75111084	soloLTR/Gypsy_Tekay	NA	Gbar_A01_89830051	soloLTR/Gypsy_Tekay	NA
Gbar_A08_86389791	soloLTR/Gypsy_Tekay	NA	Gbar_A01_95481807	soloLTR/Gypsy_Tekay	NA
Gbar_A08_86876438	soloLTR/Gypsy_Tekay	NA	Gbar_A02_77828481	soloLTR/Gypsy_Tekay	NA
Gbar_A08_89143601	soloLTR/Gypsy_Tekay	NA	Gbar_A04_77513616	soloLTR/Gypsy_Tekay	NA
Gbar_A08_90324211	soloLTR/Gypsy_Tekay	NA	Gbar_A06_33661714	soloLTR/Gypsy_Tekay	NA
Gbar_A08_90392751	soloLTR/Gypsy_Tekay	NA	Gbar_A08_86360155	soloLTR/Gypsy_Tekay	NA
Gbar_A08_90493579	soloLTR/Gypsy_Tekay	NA	Gbar_A08_86876438	soloLTR/Gypsy_Tekay	NA
Gbar_A08_91821259	soloLTR/Gypsy_Tekay	NA	Gbar_A08_87054300	soloLTR/Gypsy_Tekay	NA
Gbar_A08_92217707	soloLTR/Gypsy_Tekay	NA	Gbar_A08_89143601	soloLTR/Gypsy_Tekay	NA
Gbar_A08_92546458	soloLTR/Gypsy_Tekay	NA	Gbar_A08_90324211	soloLTR/Gypsy_Tekay	NA
Gbar_A10_30804004	soloLTR/Gypsy_Tekay	NA	Gbar_A08_90392751	soloLTR/Gypsy_Tekay	NA
Gbar_A10_84386051	soloLTR/Gypsy_Tekay	NA	Gbar_A08_91821259	soloLTR/Gypsy_Tekay	NA
Gbar_A12_23938578	soloLTR/Gypsy_Tekay	NA	Gbar_A08_92055022	soloLTR/Gypsy_Tekay	NA
Gbar_A12_51350688	soloLTR/Gypsy_Tekay	NA	Gbar_A08_92217707	soloLTR/Gypsy_Tekay	NA
Gbar_D03_11412570	soloLTR/Gypsy_Tekay	NA	Gbar_A08_92546458	soloLTR/Gypsy_Tekay	NA
Gbar_D05_13271885	soloLTR/Gypsy_Tekay	NA	Gbar_A09_21149198	soloLTR/Gypsy_Tekay	NA
Gbar_D07_41406468	soloLTR/Gypsy_Tekay	NA	Gbar_A12_51350688	soloLTR/Gypsy_Tekay	NA
Gbar_D11_50677868	soloLTR/Gypsy_Tekay	NA	Gbar_D03_18107897	soloLTR/Gypsy_Tekay	NA
Gbar_D11_50848074	soloLTR/Gypsy_Tekay	NA	Gbar_D11_51780725	soloLTR/Gypsy_Tekay	NA
Gbar_D11_51780725	soloLTR/Gypsy_Tekay	NA	Gbar_D11_53411025	soloLTR/Gypsy_Tekay	NA
Gbar_D11_52280191	soloLTR/Gypsy_Tekay	NA	Gbar_A01_108785467	soloLTR/unknown_CRM	NA
Gbar_D11_53411025	soloLTR/Gypsy_Tekay	NA	Gbar_A01_63220867	soloLTR/unknown_CRM	NA
Gbar_A01_106305879	soloLTR/unknown_CRM	NA	Gbar_A01_71171538	soloLTR/unknown_CRM	NA
Gbar_A01_71171538	soloLTR/unknown_CRM	NA	Gbar_A01_73090726	soloLTR/unknown_CRM	NA
			Gbar_A01_104695384	soloLTR/unknown_Tekay	Gbar_A01G016930
			Gbar_A01_104695384	soloLTR/unknown_Tekay	Gbar_A01G016940
			Gbar_A01_57616094	soloLTR/unknown_Tekay	NA

## Sheet: Stable6
Table S6. Genome assemblies used for this study, accession names and origin. Assemblies used as reference for the pangenome are indicated in bold.
Species	Genome type	Assembly	Wild/ domesticated	Origin	Ref
G. herbaceum	A1	A1a (wild)	W	Africa	Wang et al (2022)
G. arboreum	A2	SYX1	W	Africa	Wang et al (2022)
G. raimondii	D5	GPD5lz	W	Mexico	Wang et al (2022)
G. hirsutum	AD1	TM1 (CRI version)	D	US (Texas)	Yang et al (2019)
		B713	D	US (Texas)	Perkin et al (2021)
		Bar32	D	US (Texas)	Perkin et al (2021)
		NDM8	D	China	Ma et al (2021)
		ZM24	D	China	Yang et al (2019)
		TX-1000	W	Egypt	Peng et al., (2024)
		CRI12	D	China	Lu et al., (2022)
		TX2094	W	Mexico	Ning et al (2024)
G. barbadense	AD2	3-79	D	China	Chen et al (2020)
		Pima90	D	China	Ma et al (2021)
		GB0262	D	Caribbean	Meng et al (in revision)
		GB0333	W	Peru	Meng et al (in revision)
		Yuma	D	China	Meng et al (in revision)
		K101	W	Wild (Bolivia)	Meng et al (in revision)
		Giza7	D	Egypt	Meng et al (in revision)
		GB0414	W	Peru	Meng et al (in revision)
		GB0660	W	Peru	Meng et al (in revision)
		GB0776	W	Brazil	Meng et al (in revision)
		Junhai-1	D	China	Meng et al (in revision)
